# Supplementary material
Source: PubMed Central journal article supplement (PMC4274340)
Supplement: opx-92-31-s001.pdf [file opx-92-31-s001.pdf]

# A Day at the Eye Doctor!

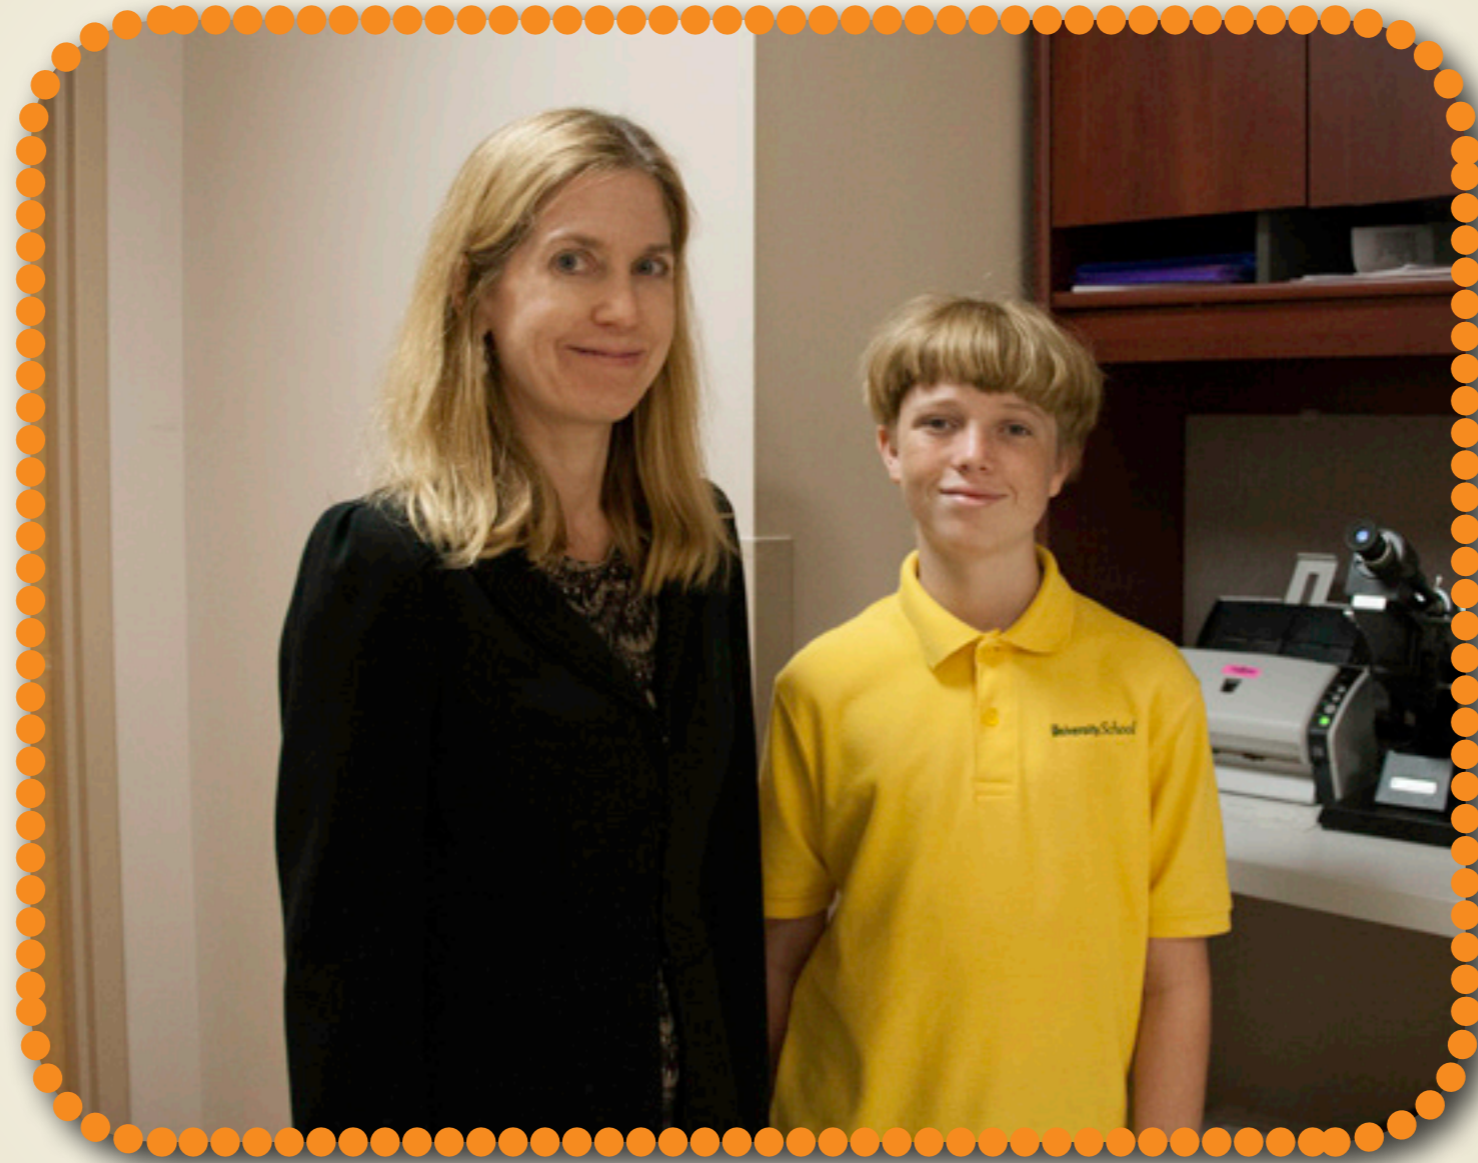

**My name is Riley.  
Today I went to the  
eye doctor.**

**I will tell you what  
I did at the eye  
doctor.**

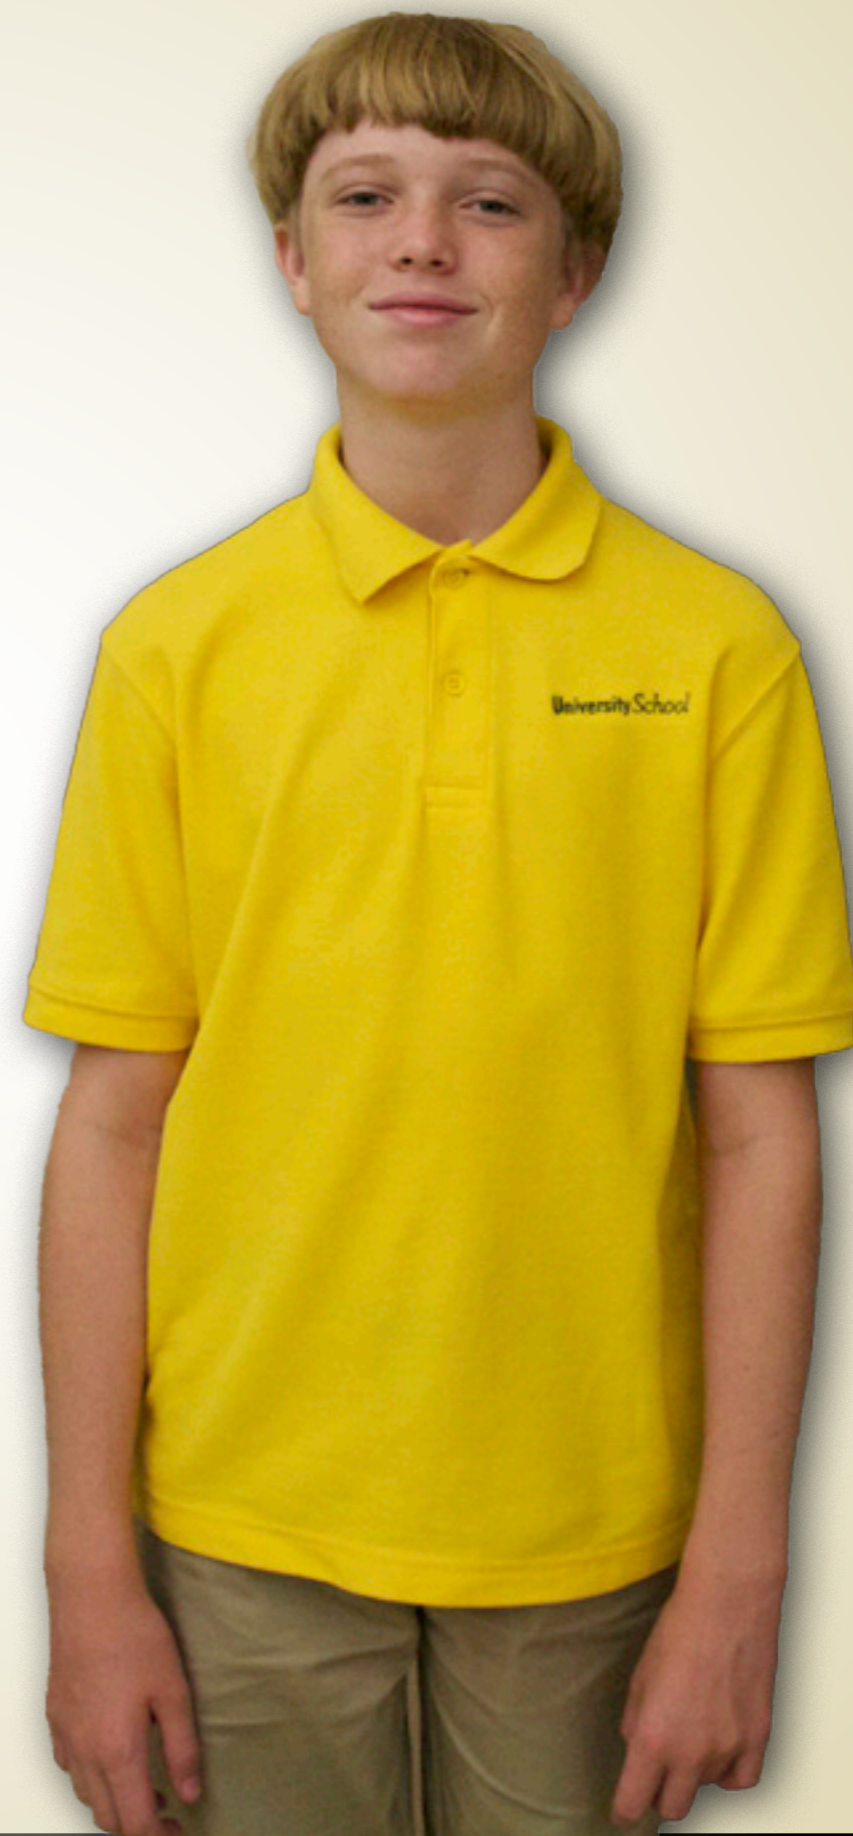

**First, I went in  
an elevator.**

**I went up to the  
2nd floor in the  
elevator.**

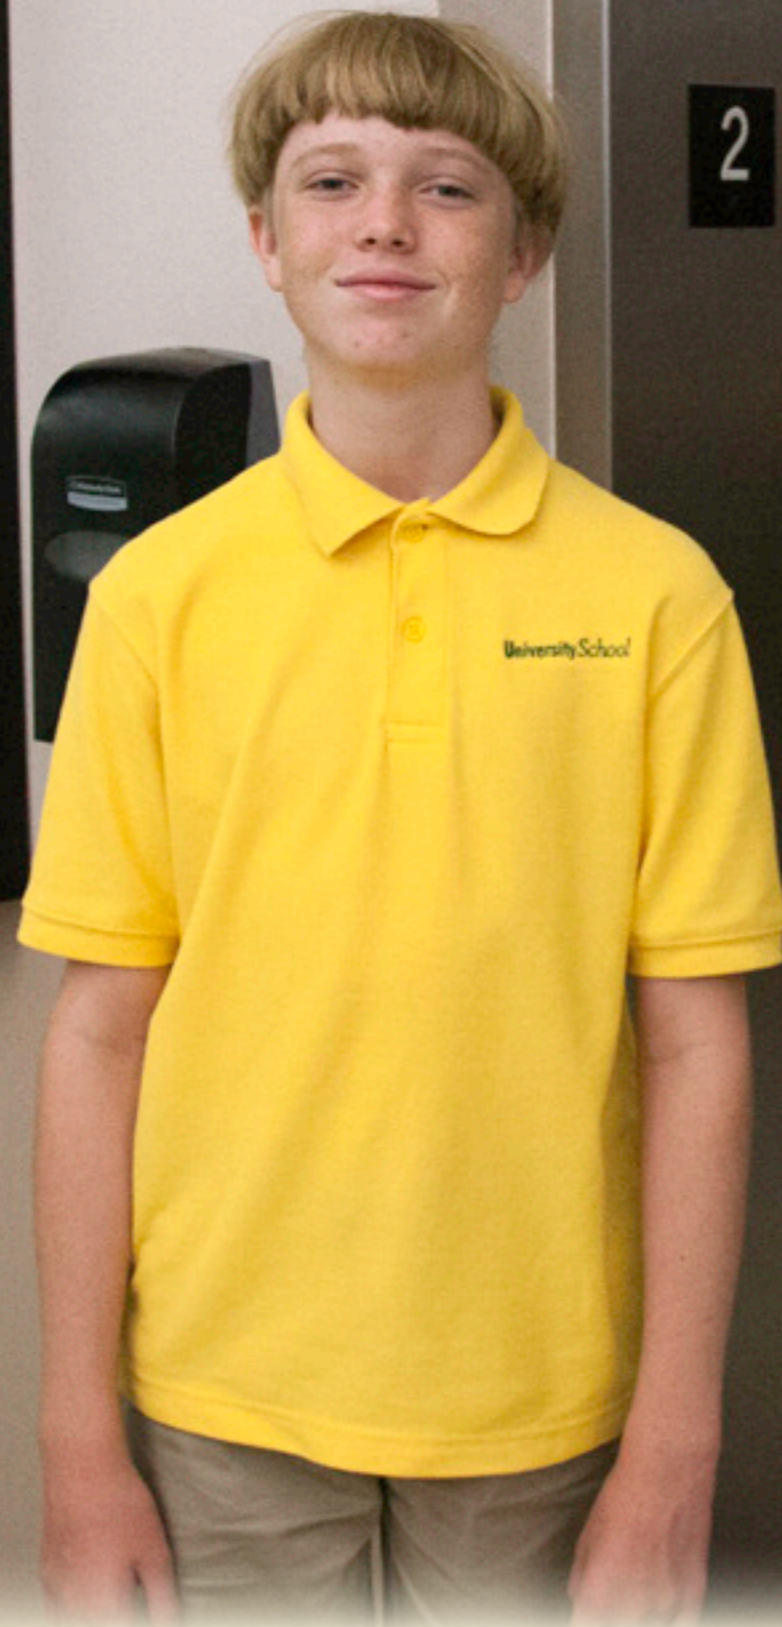

**Then, I met my doctor.**

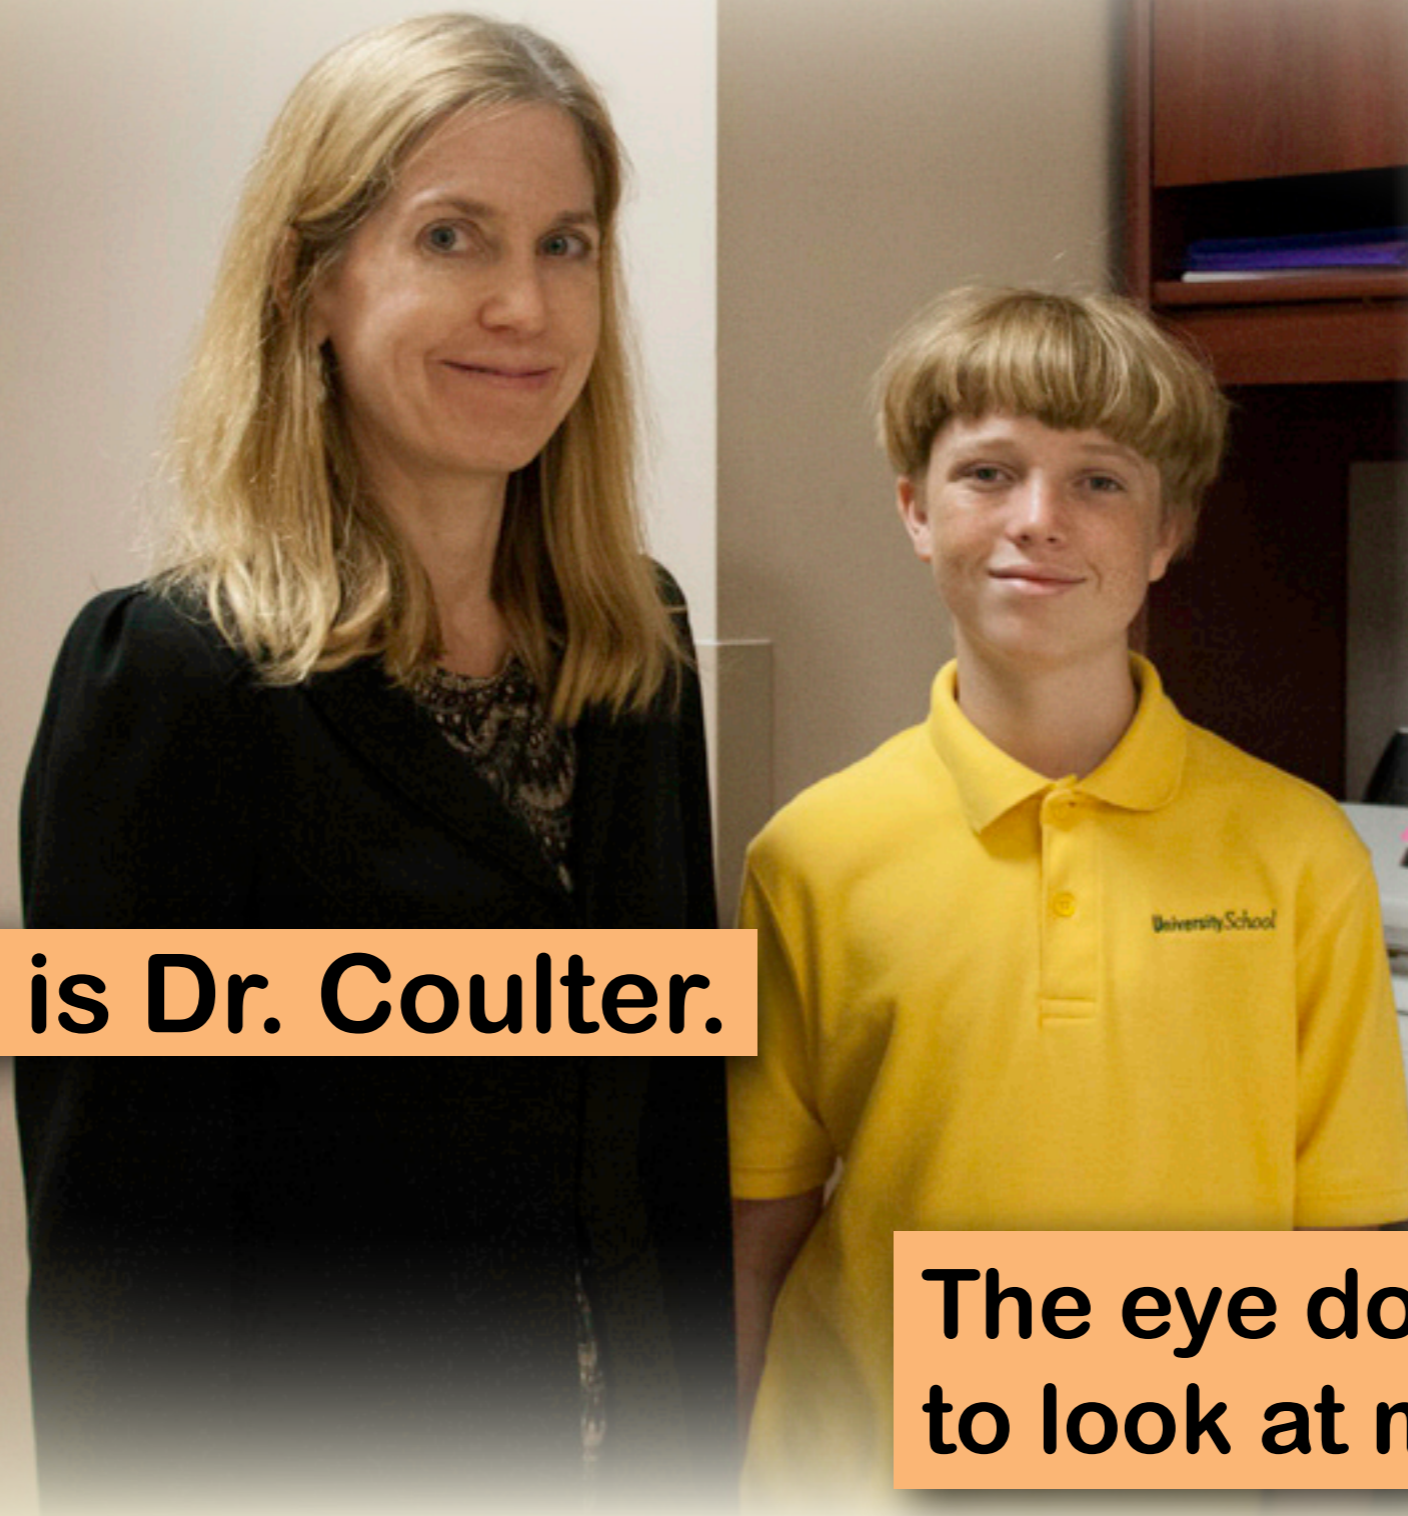

**Her name is Dr. Coulter.**

**The eye doctor wants to look at my eyes.**

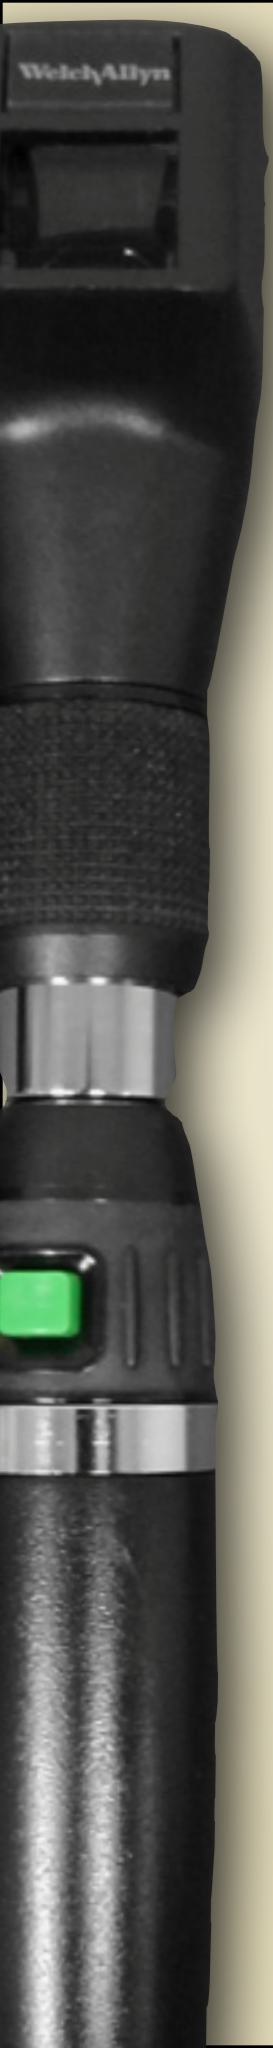

**We walked through  
a hallway to her  
room.**

**There are tools  
the eye doctor  
will use in the  
room.**

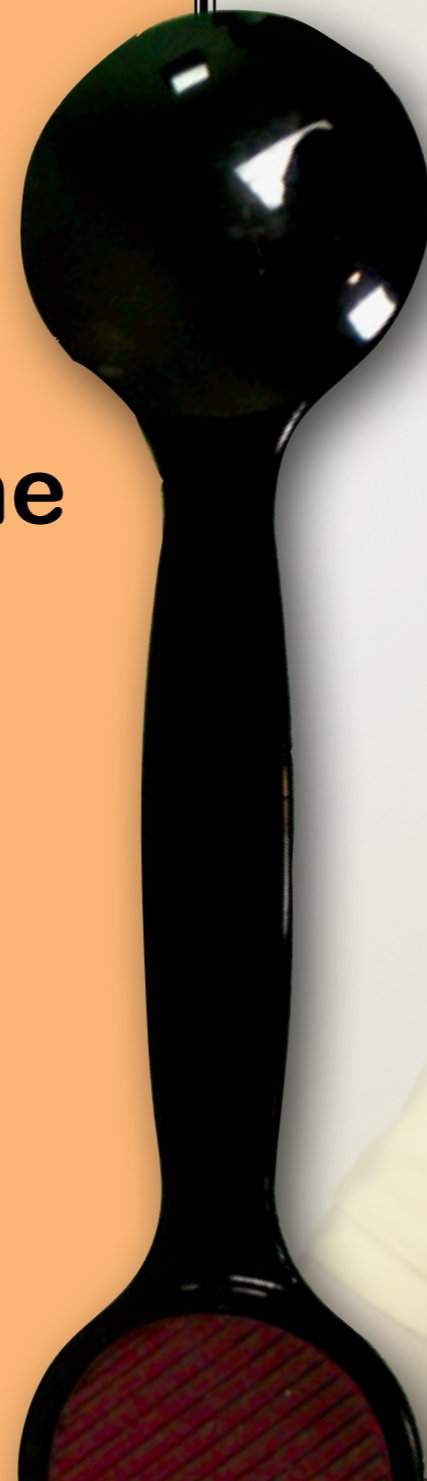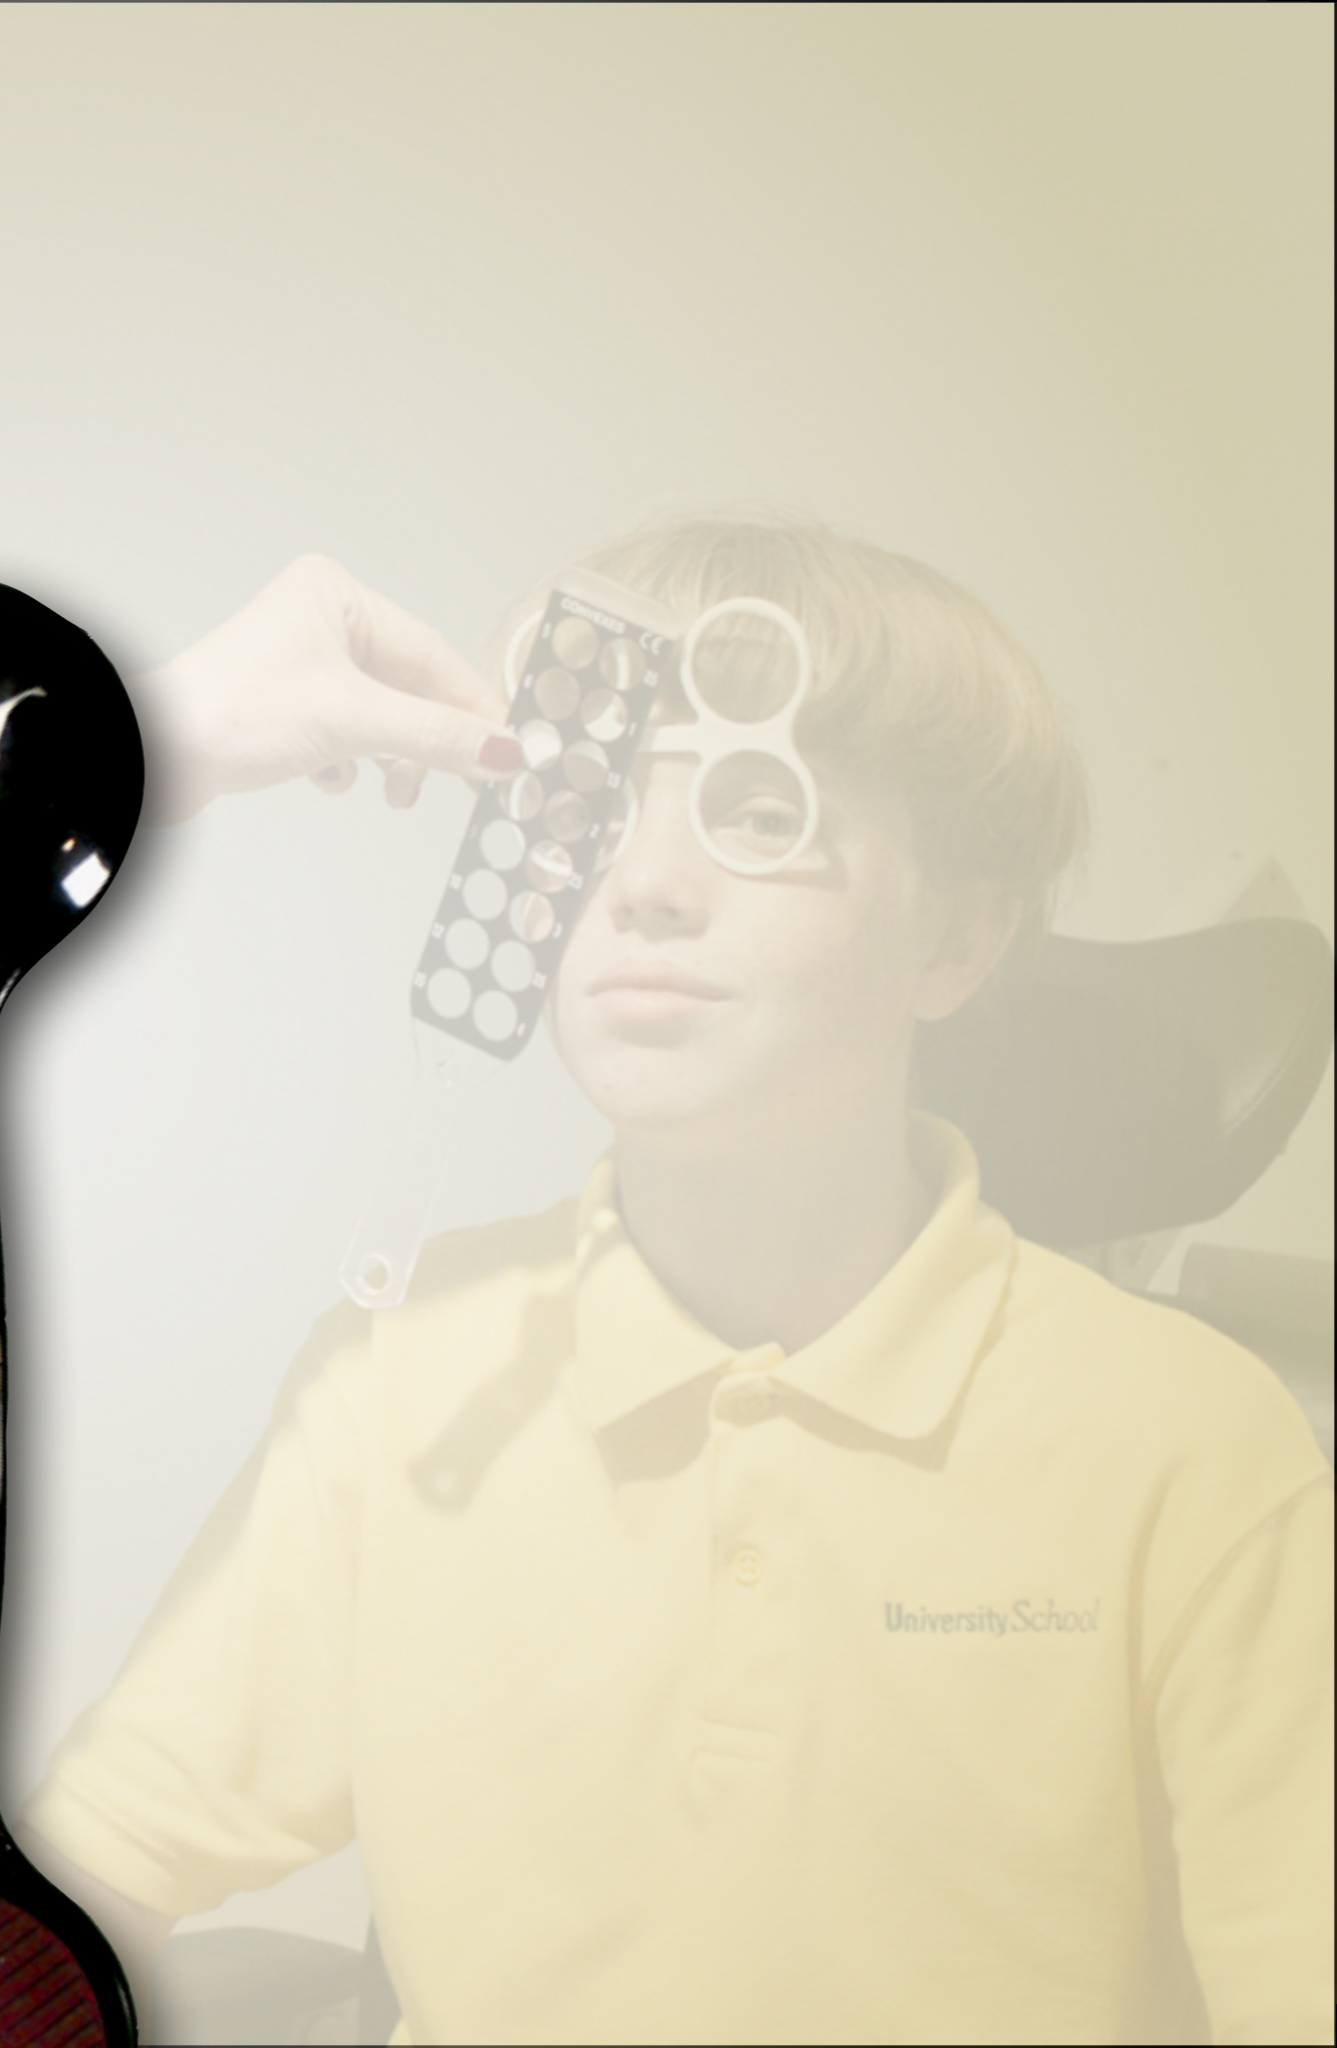

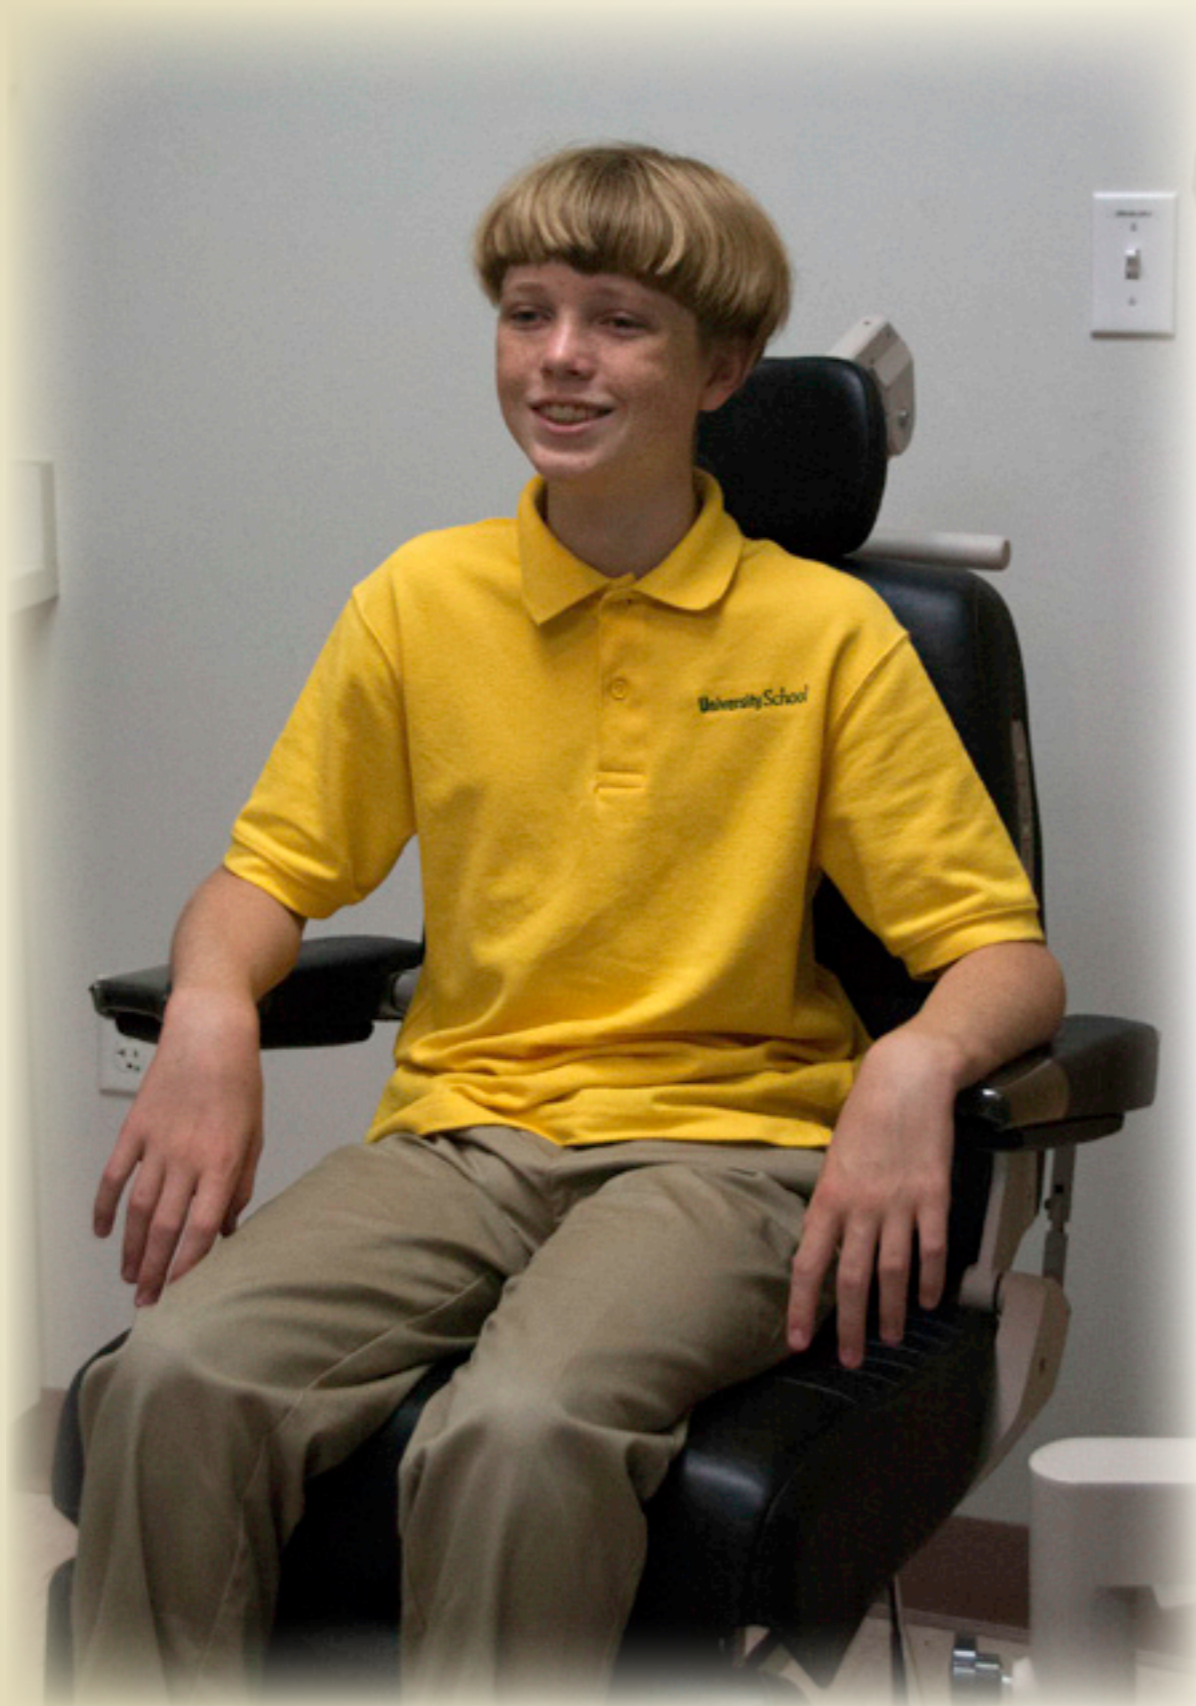

**The eye doctor  
said I can sit in a  
big black chair.**

**I will stay in the  
black chair so  
the doctor can  
look at my eyes.**

T O G Z S

A P Z T 5

P O S Z F

R L F K T

S L O F P 2

Then the doctor showed a chart with letters on it. I read all of the letters I could.

When I couldn't see what the letters were, I told the doctor, "I don't know."

**Then the eye doctor  
turned off the lights.**

**I could see things on  
a wall far away.**

**The eye doctor took  
out a black spoon to  
cover one eye and  
then the other.**

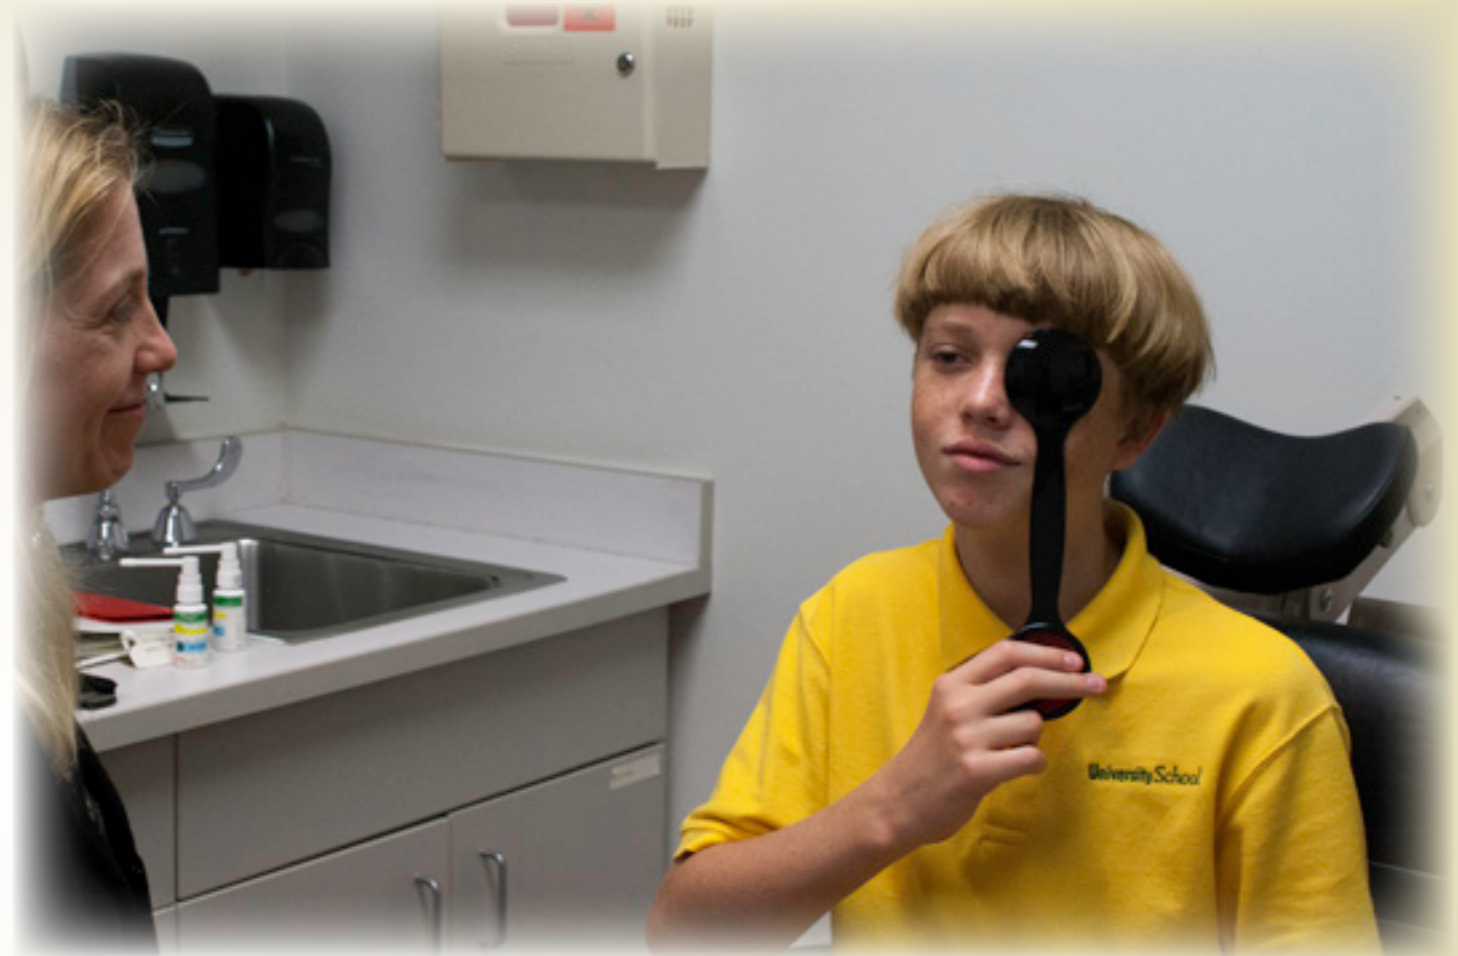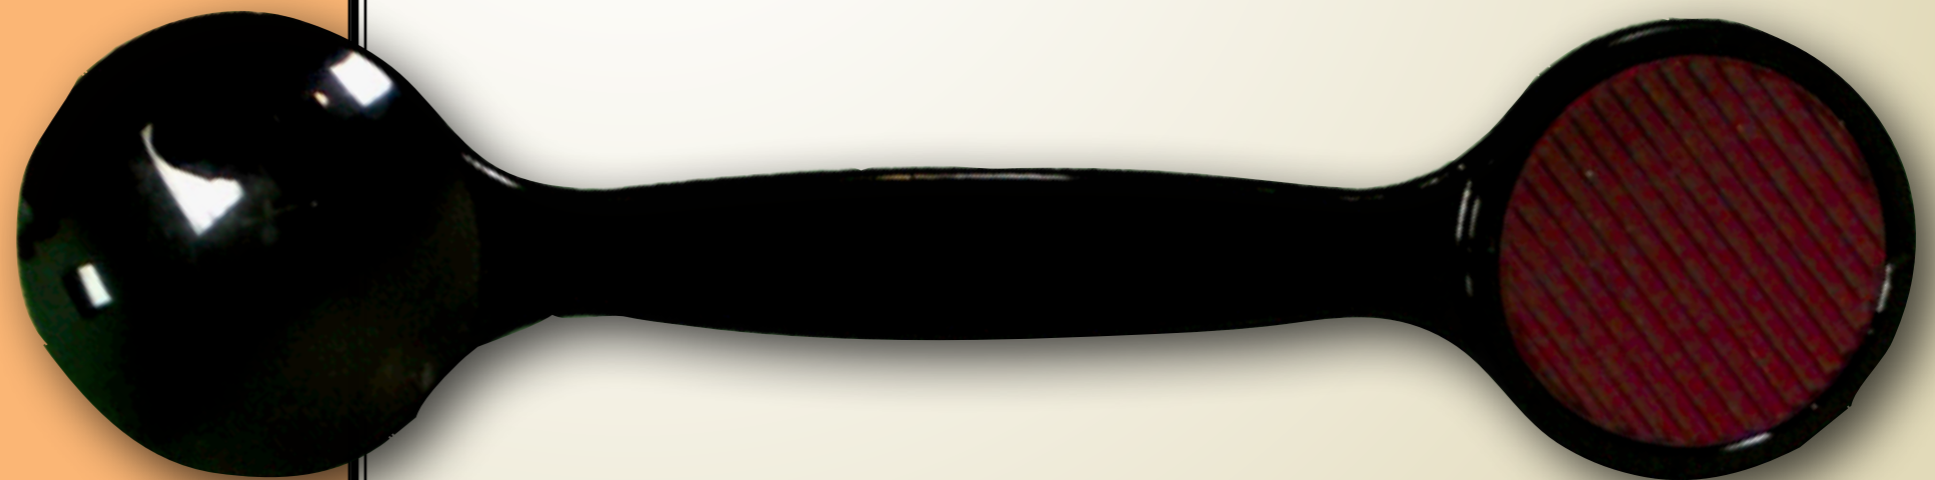



With the spoon  
over one of my  
eyes, the doctor  
asked me to read  
letters far away.

When I could not  
read the letters  
I said, "I don't  
know."

T O G Z S

A P Z T 5

P O S Z F

R L F K T

S L O F P 2

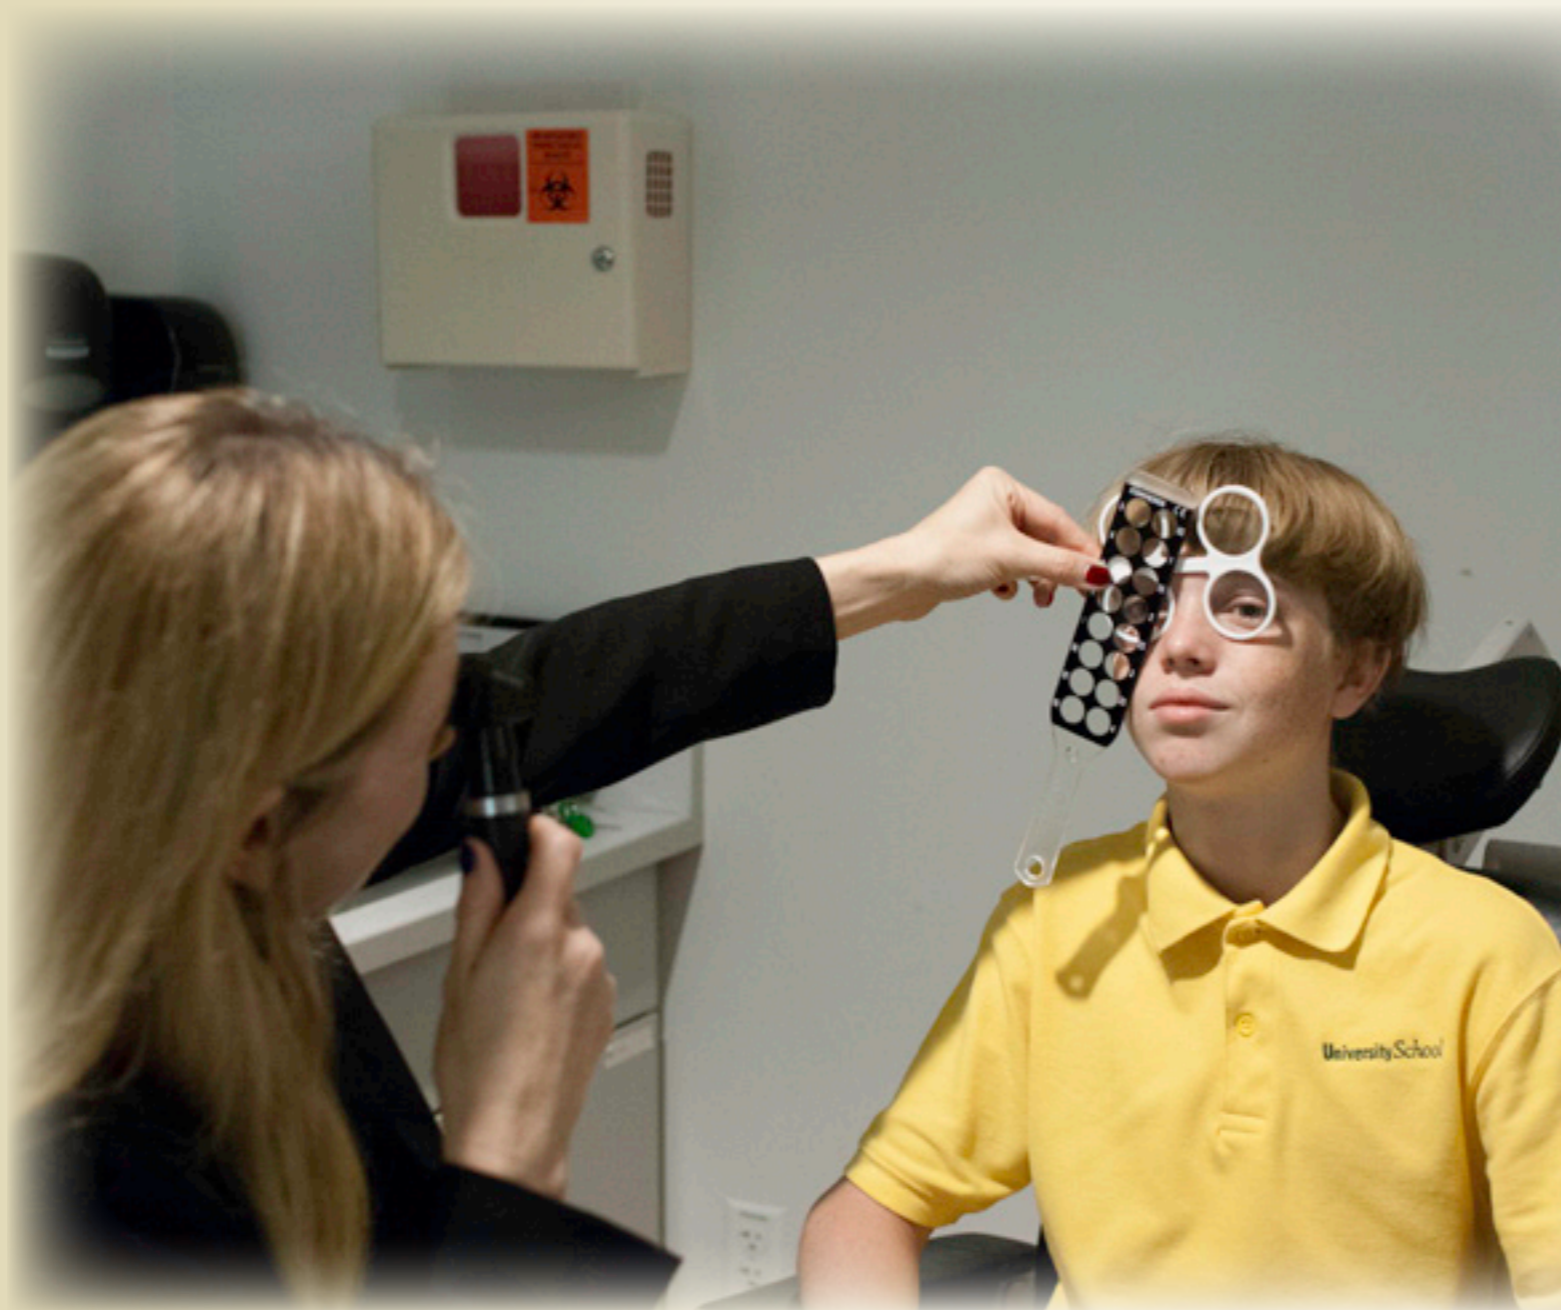

**Then I held special glasses on my eyes.**

**The glasses made things look blurry.**

**I looked through the glasses at a toy far away.**

**Then the doctor held a stick with letters and pictures on it.**

**The doctor asked me to look at a letter.**

**She moved the stick closer and closer while I looked at it. The doctor also held a ruler.**

**The doctor used the ruler to measure how far the stick was from my eyes.**

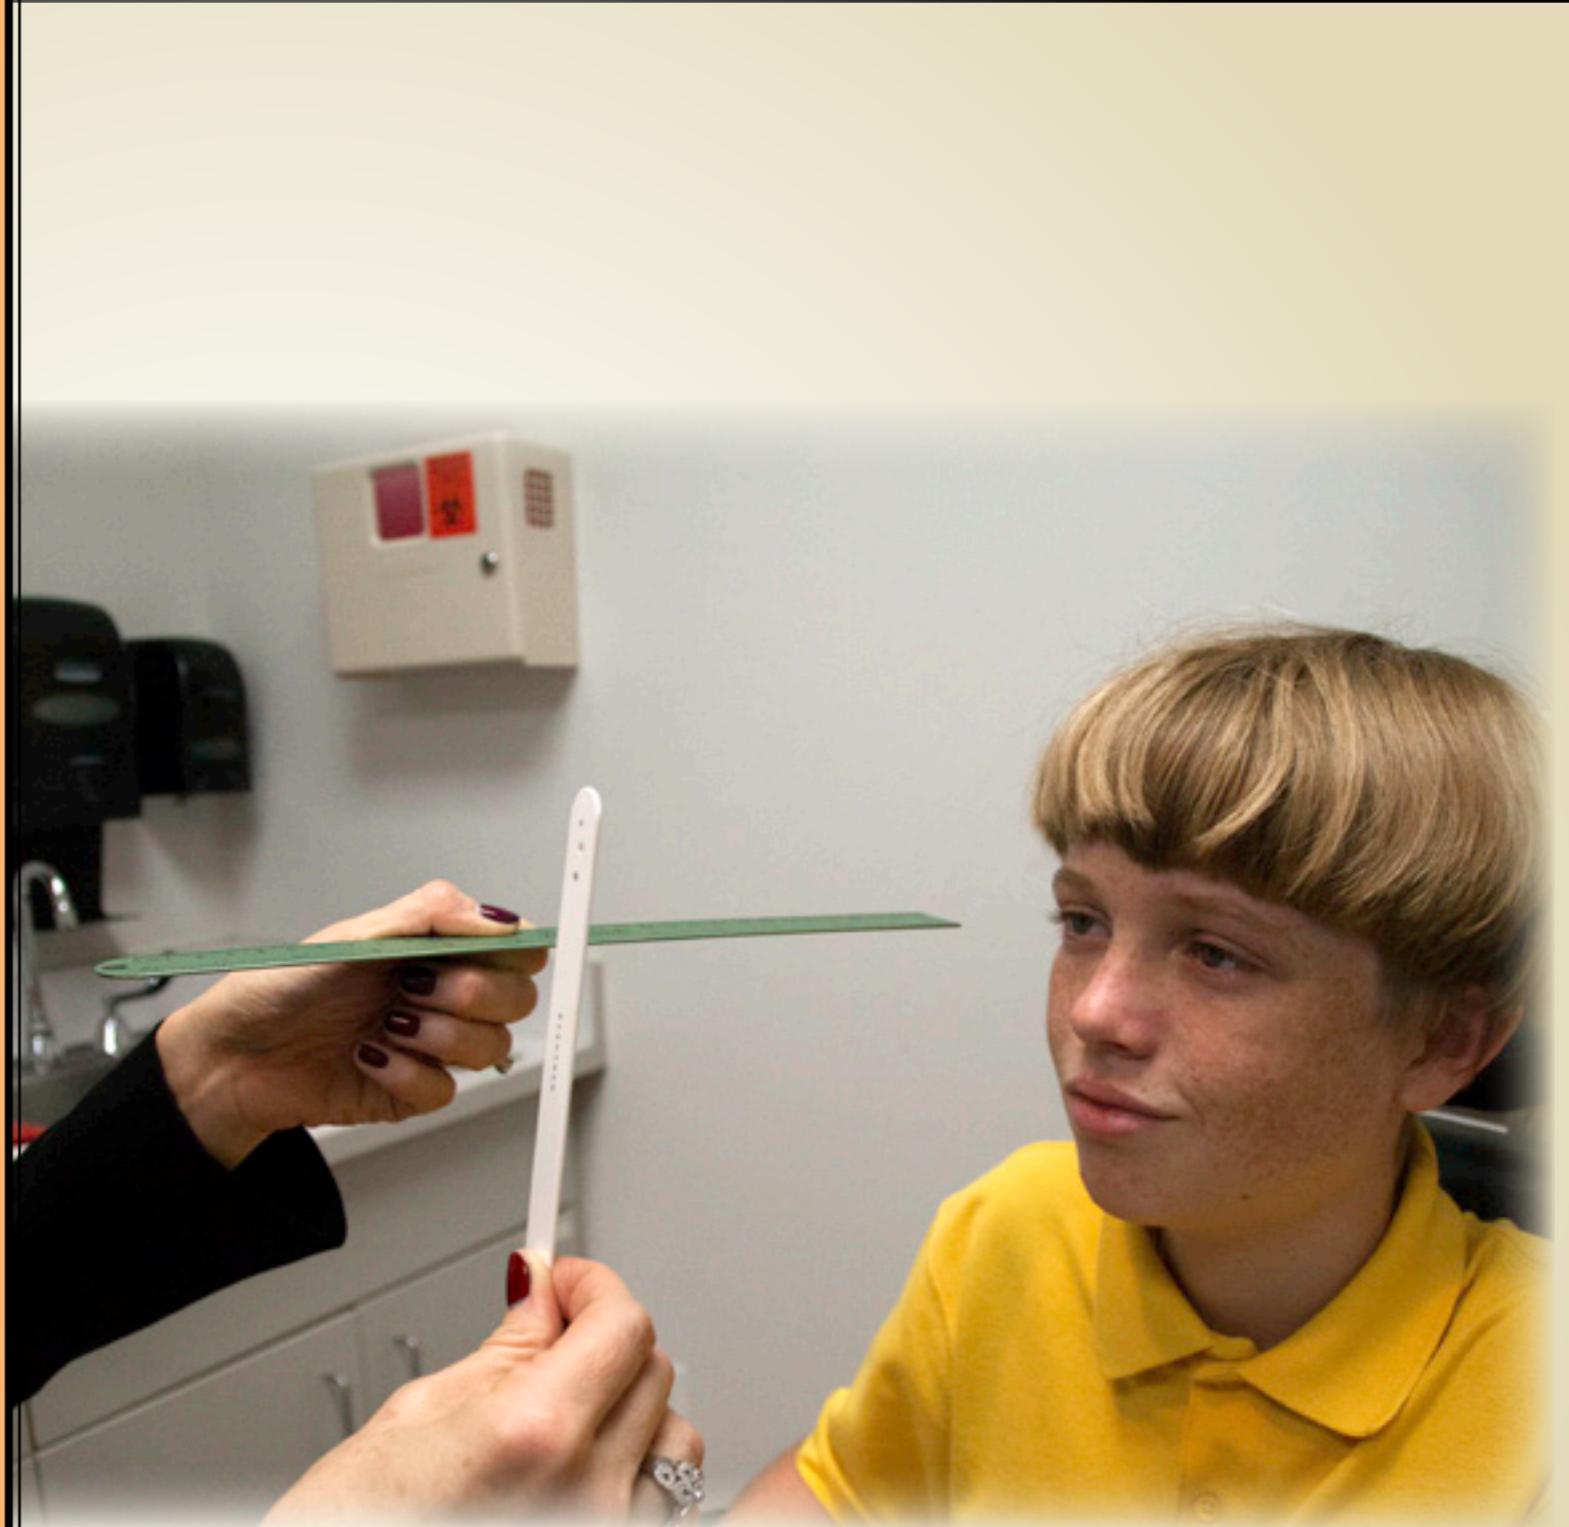

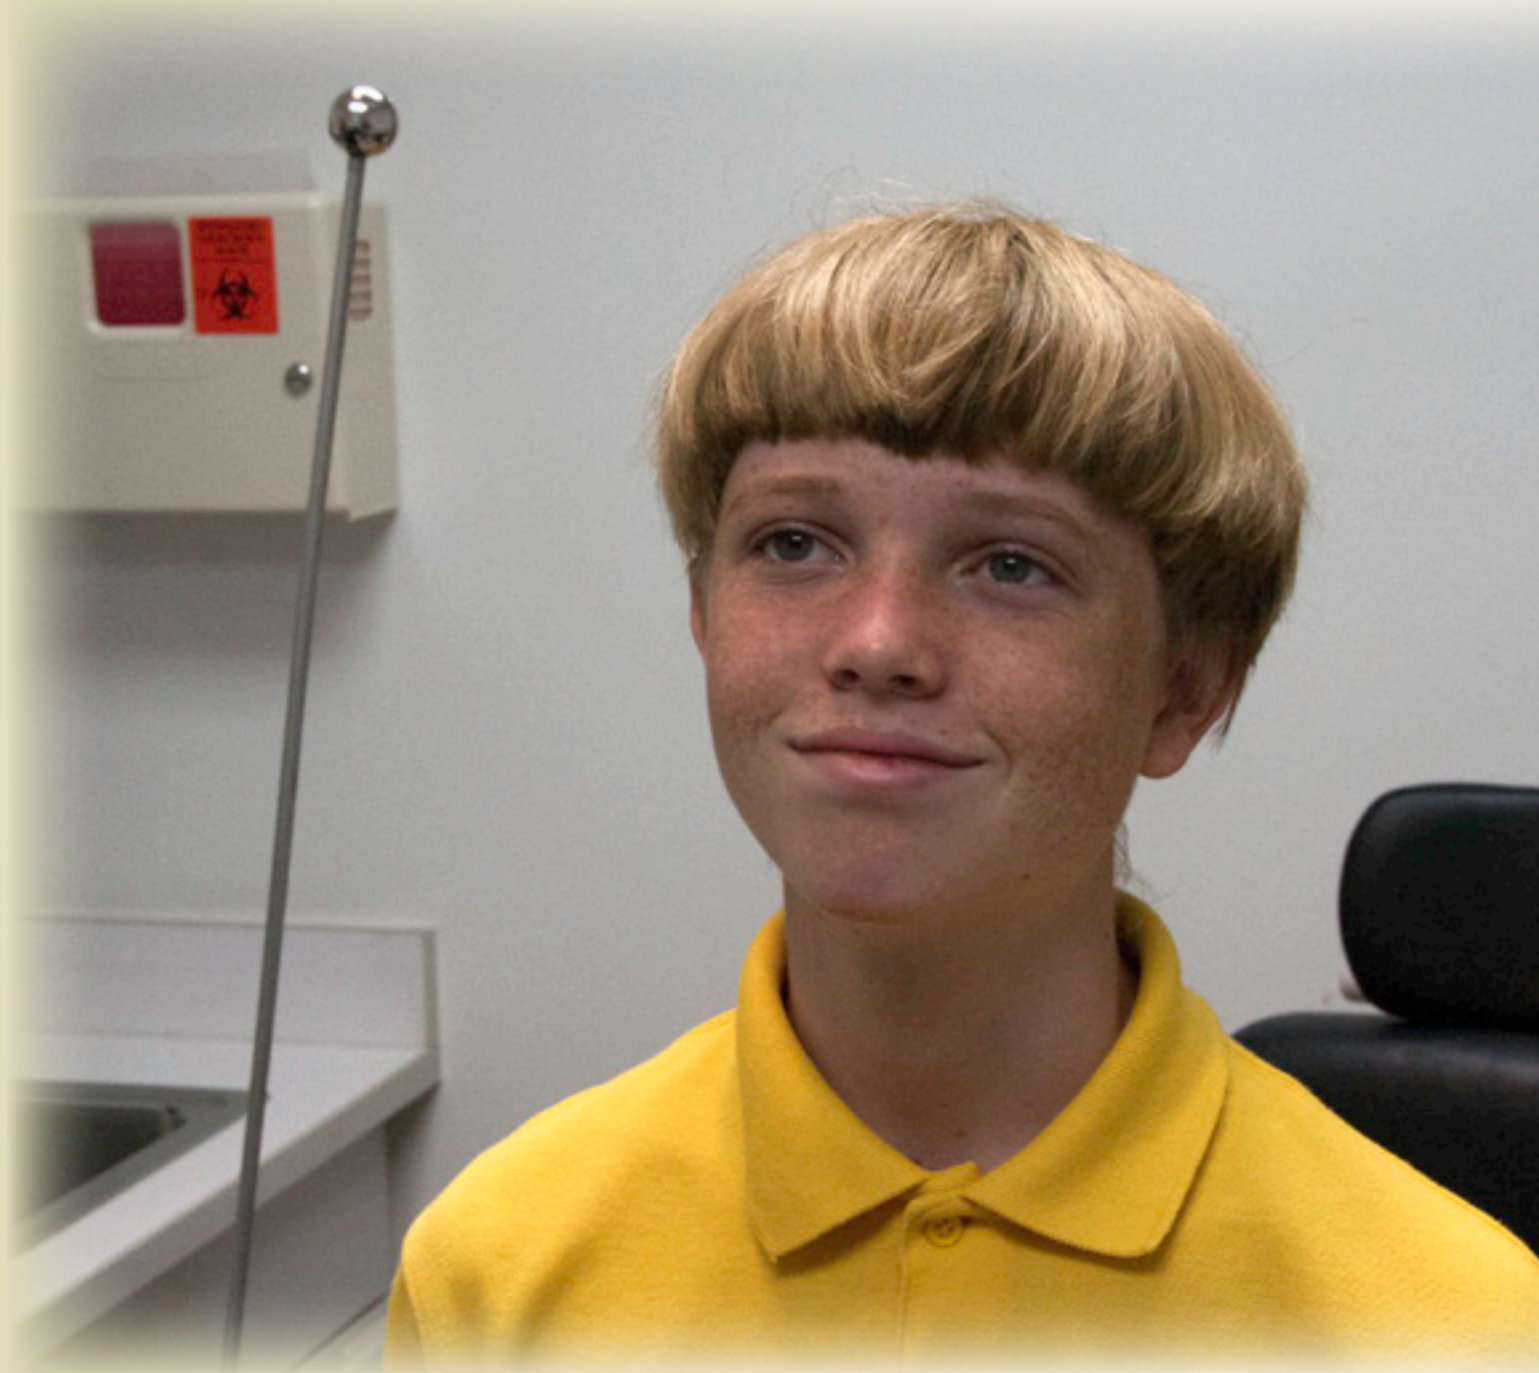

**Then the doctor showed me a stick with a silver ball on it.**

**I watched the ball when the doctor moved the stick.**

**Then, the doctor held a stick with a gold ball on it.**

**The doctor held the two sticks.**

**The doctor told me to look at the gold ball.**

**Then, the doctor told me to look at the silver ball.**

**Then, the doctor told me to look at the gold ball.**

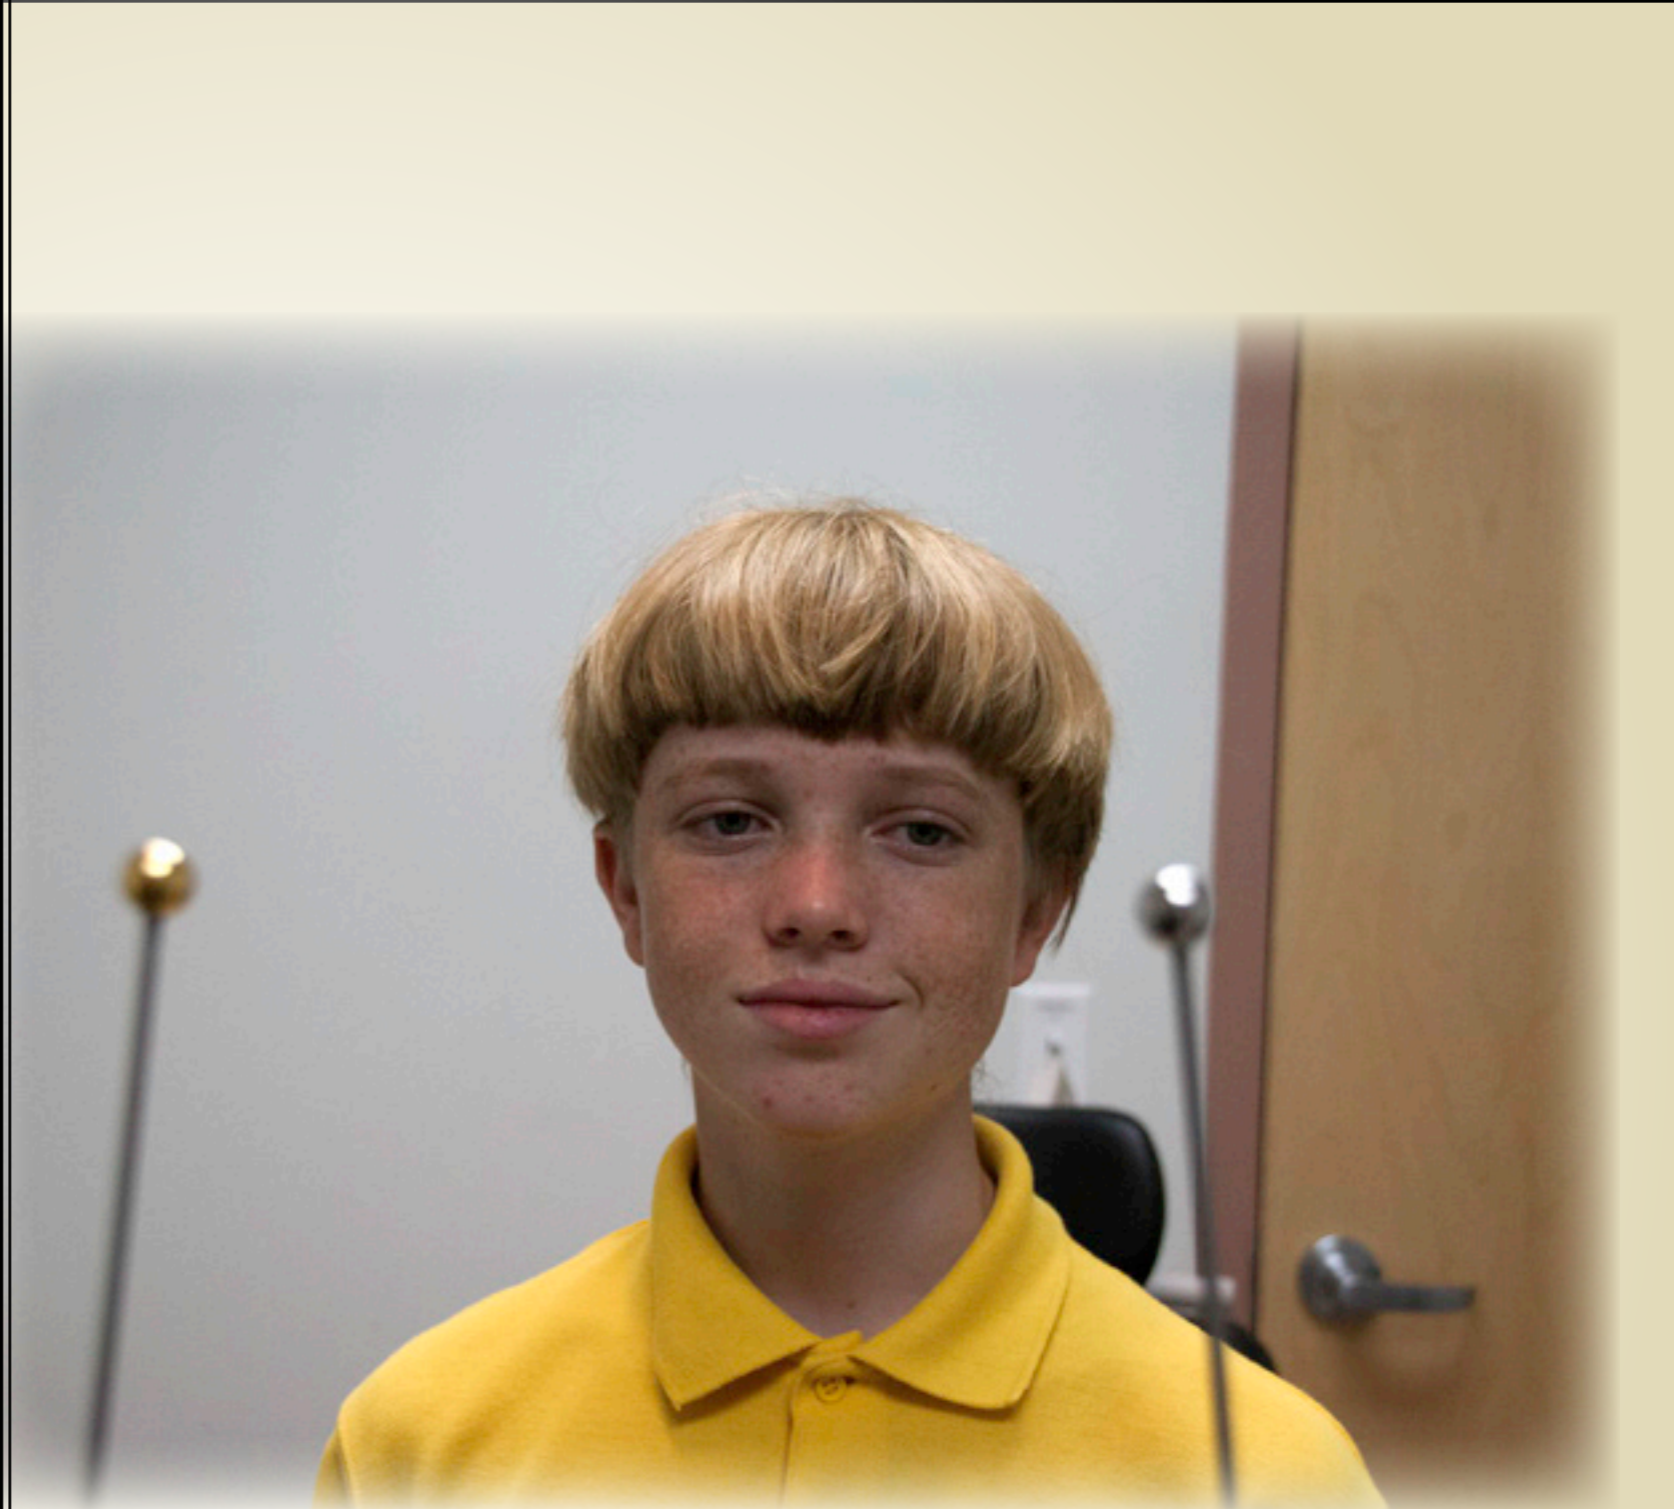

Then, the doctor held a stick with letters and pictures on it.

The doctor also had a bar with windows.  
The doctor told me to look at a letter on the stick.

The doctor moved the window bar. I looked at the letter.

Then I saw two letters. I told the doctor.

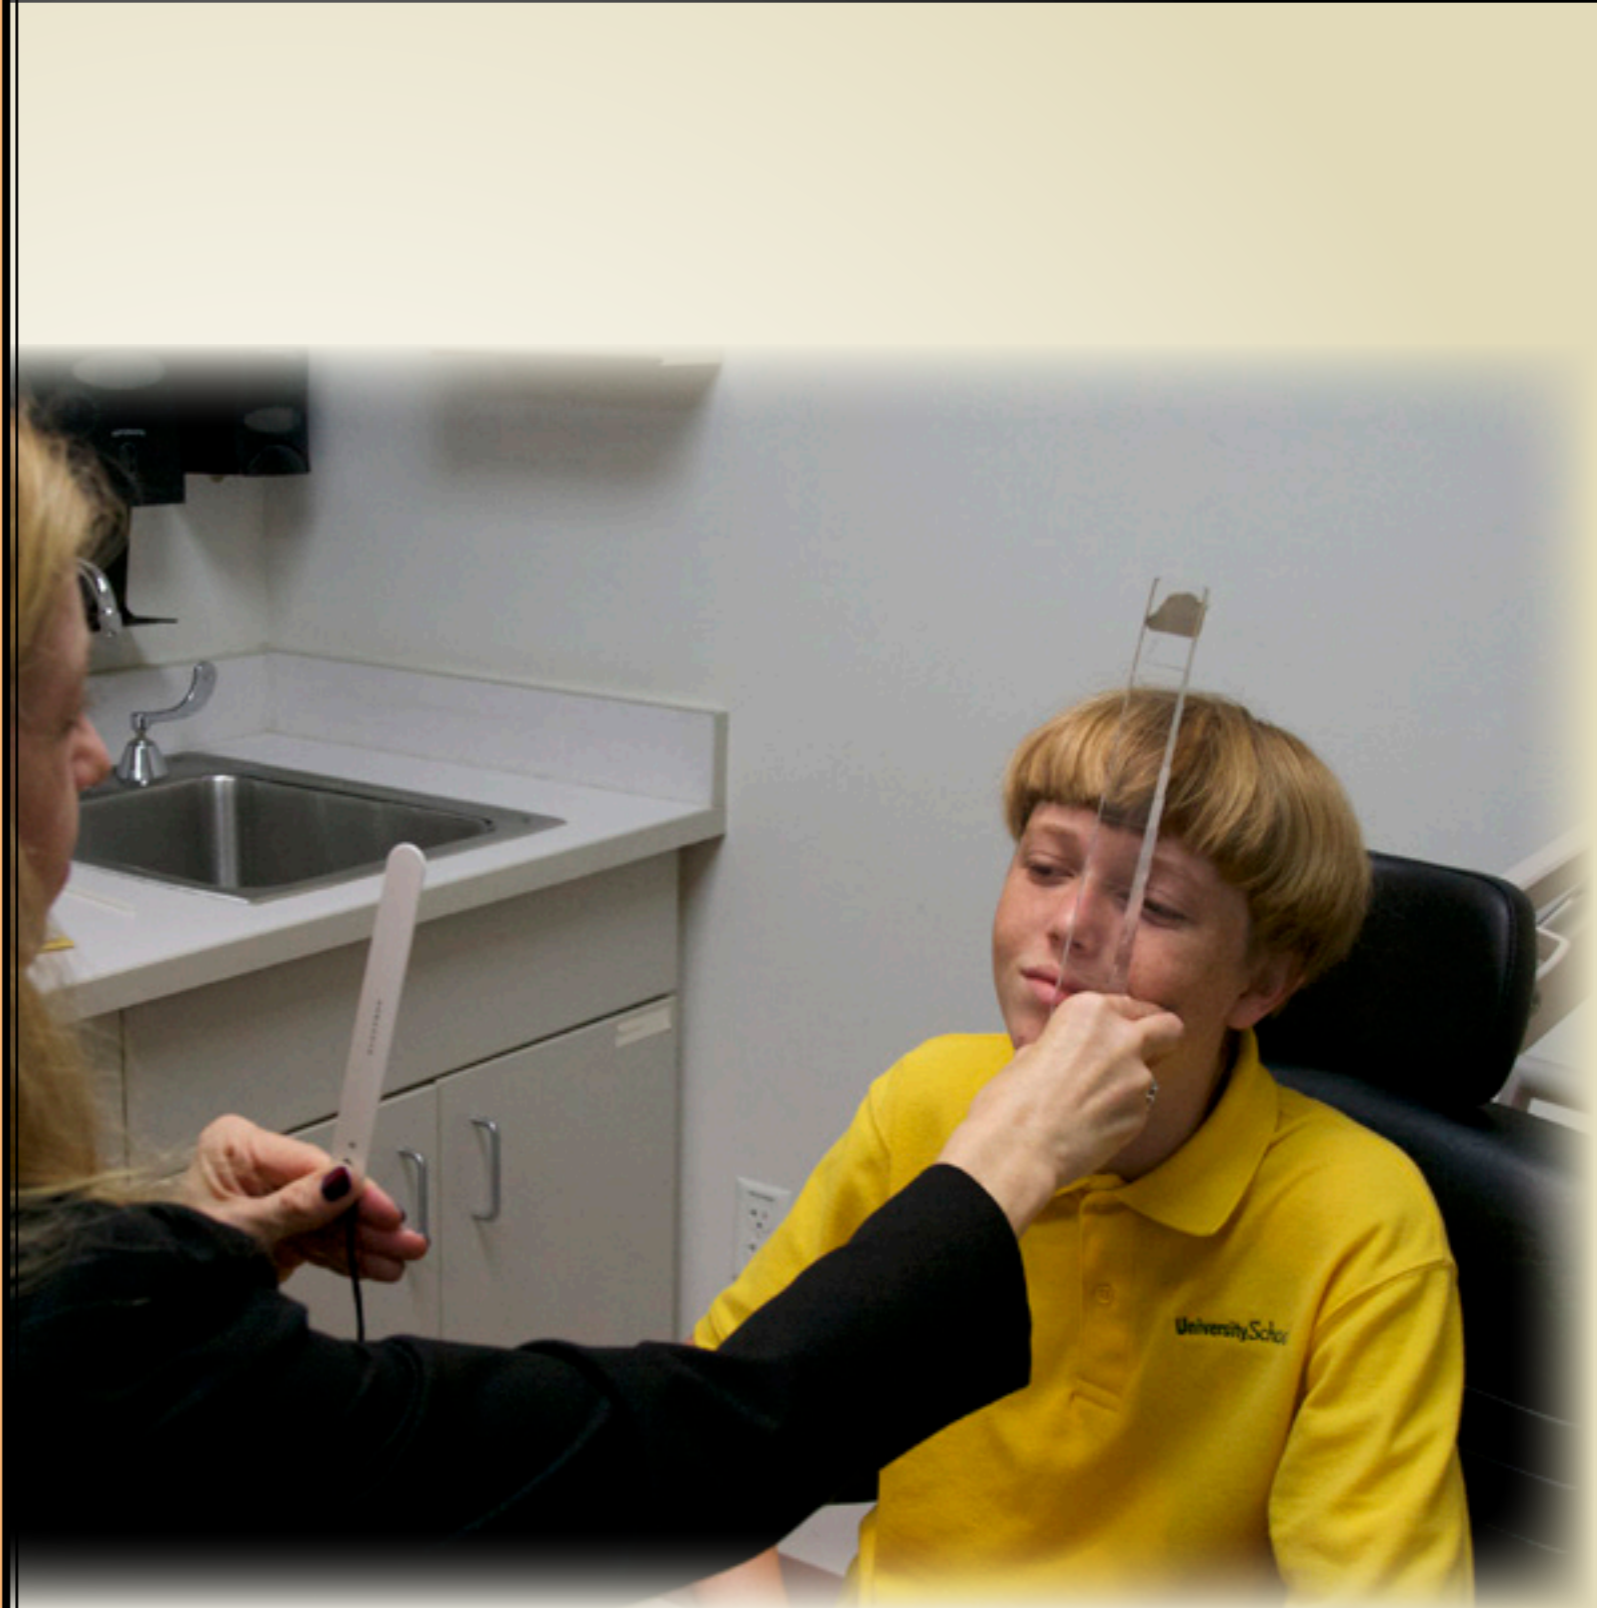

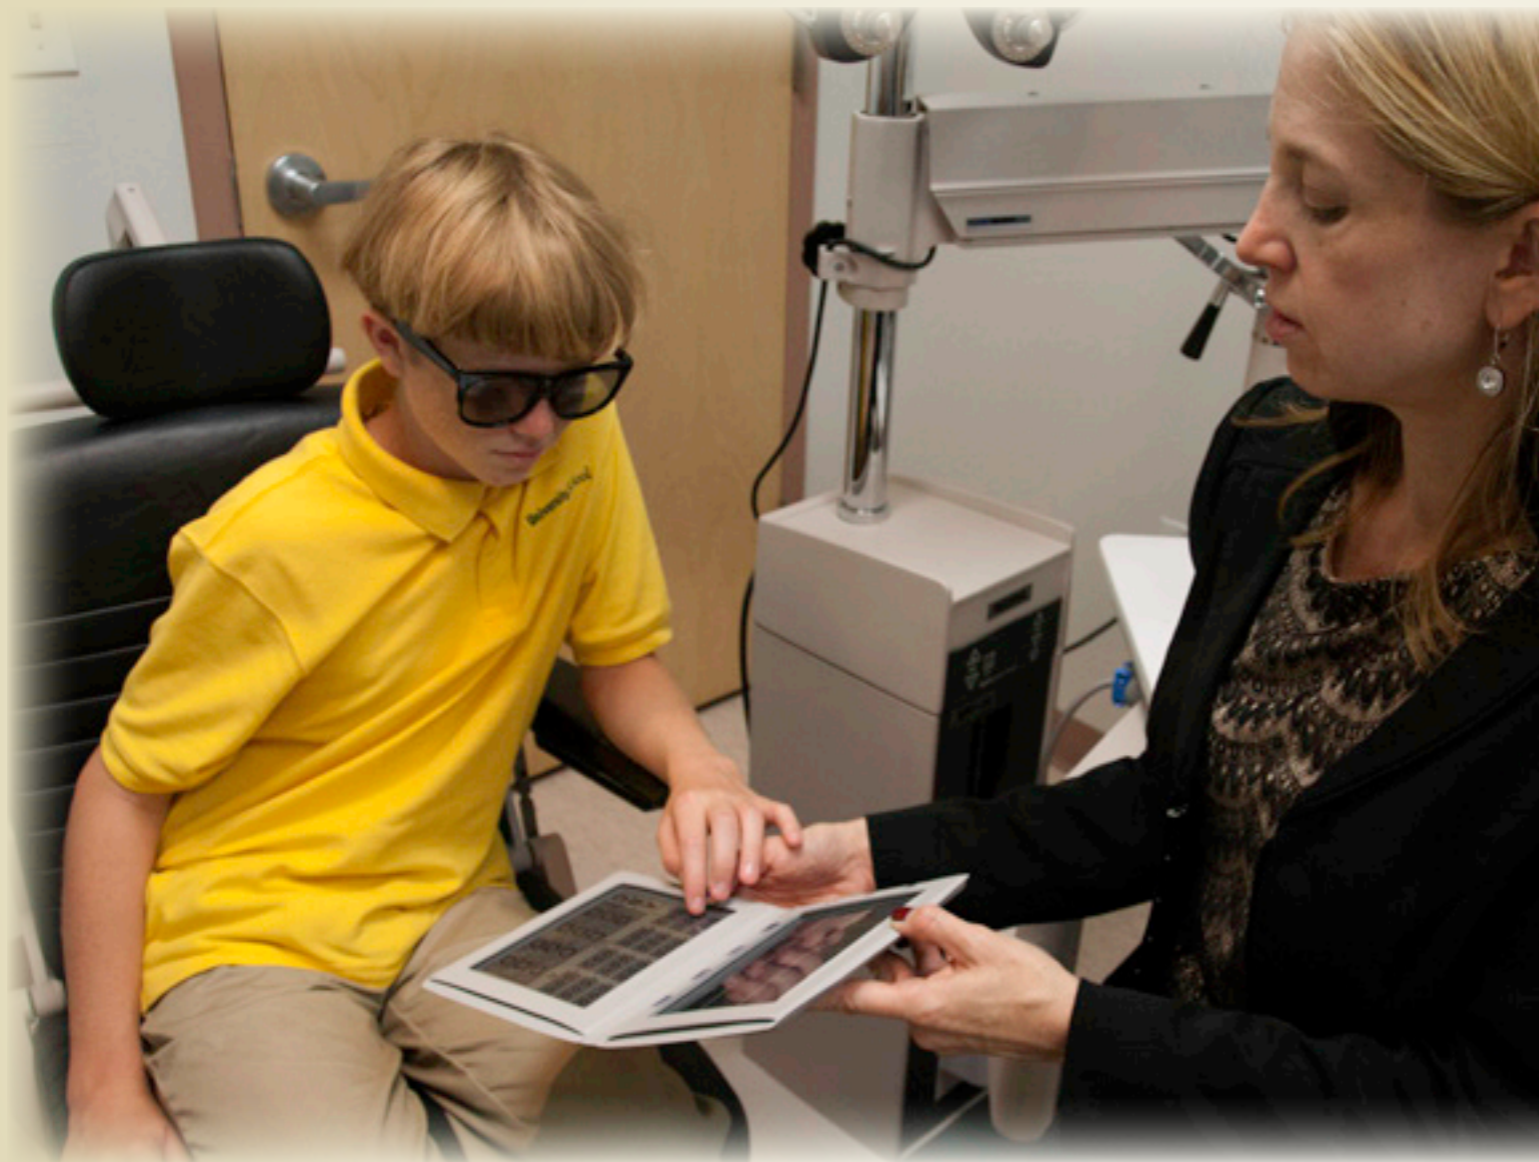

**The doctor gave me sunglasses. I put them on.**

**The doctor showed me pictures.**

**The doctor told me point to pictures that were floating.**

**The doctor showed me the stick with letters and pictures again.**

**The doctor told me to tell her what letters and pictures I saw.**

**When I did this, the doctor shined her flashlight in my eyes.**

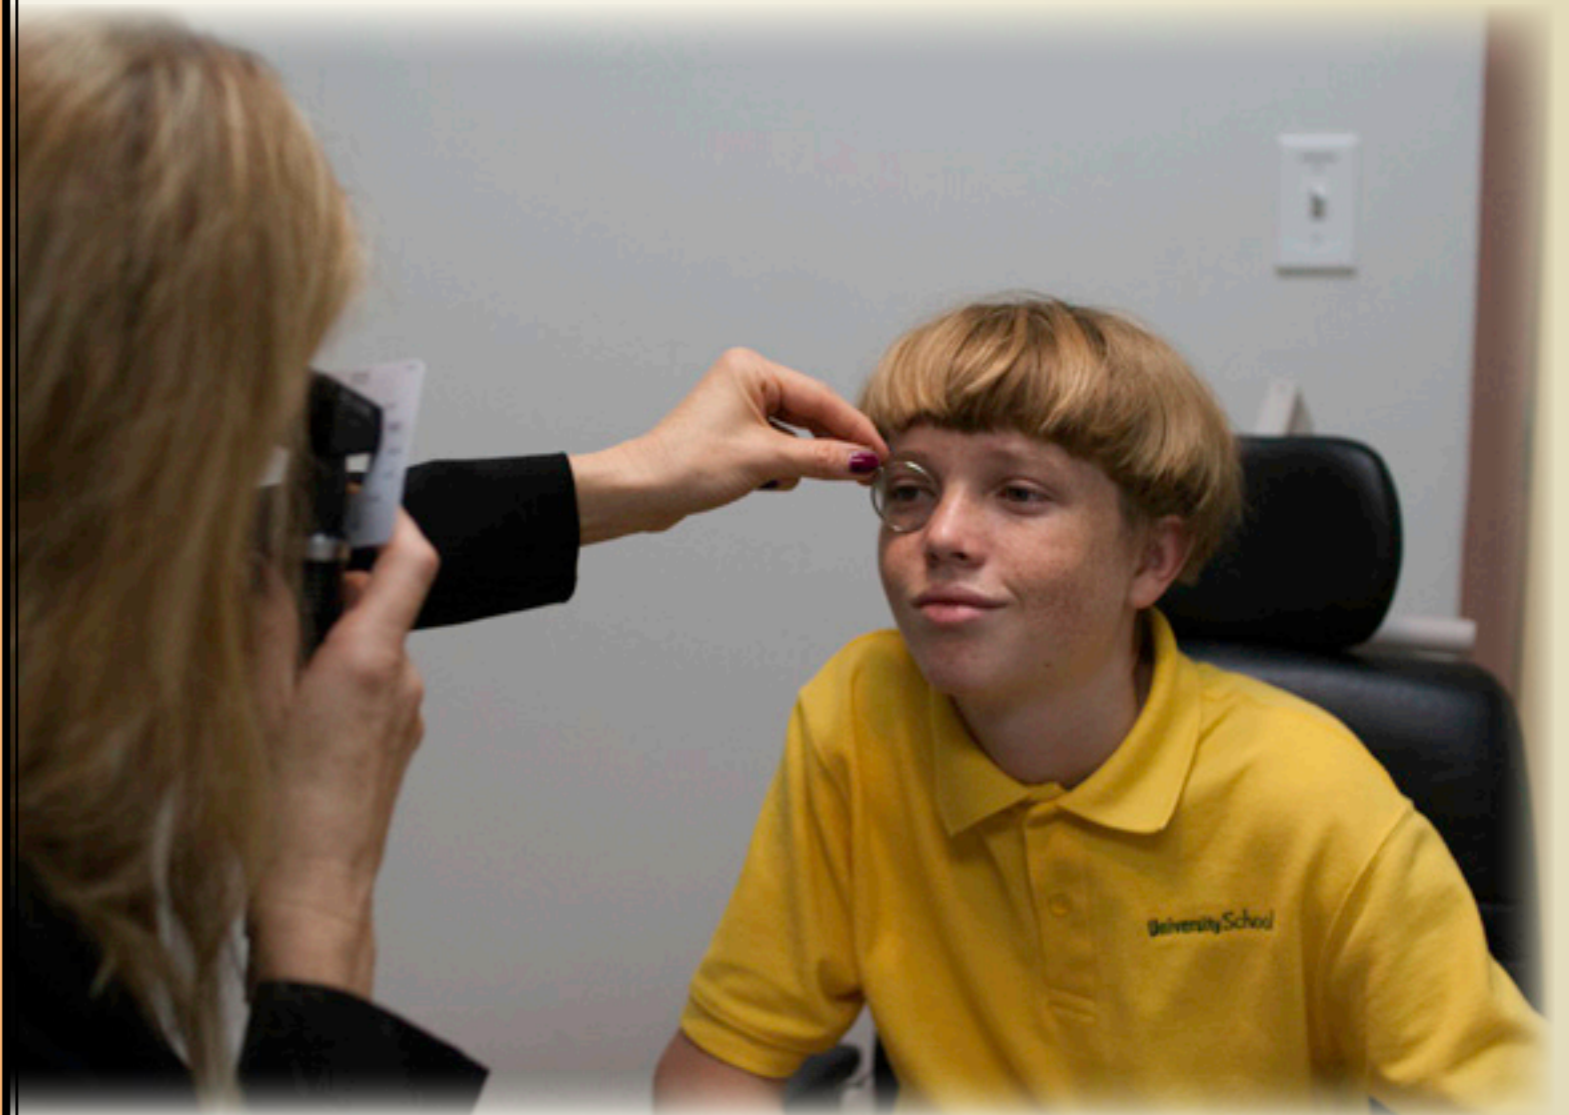



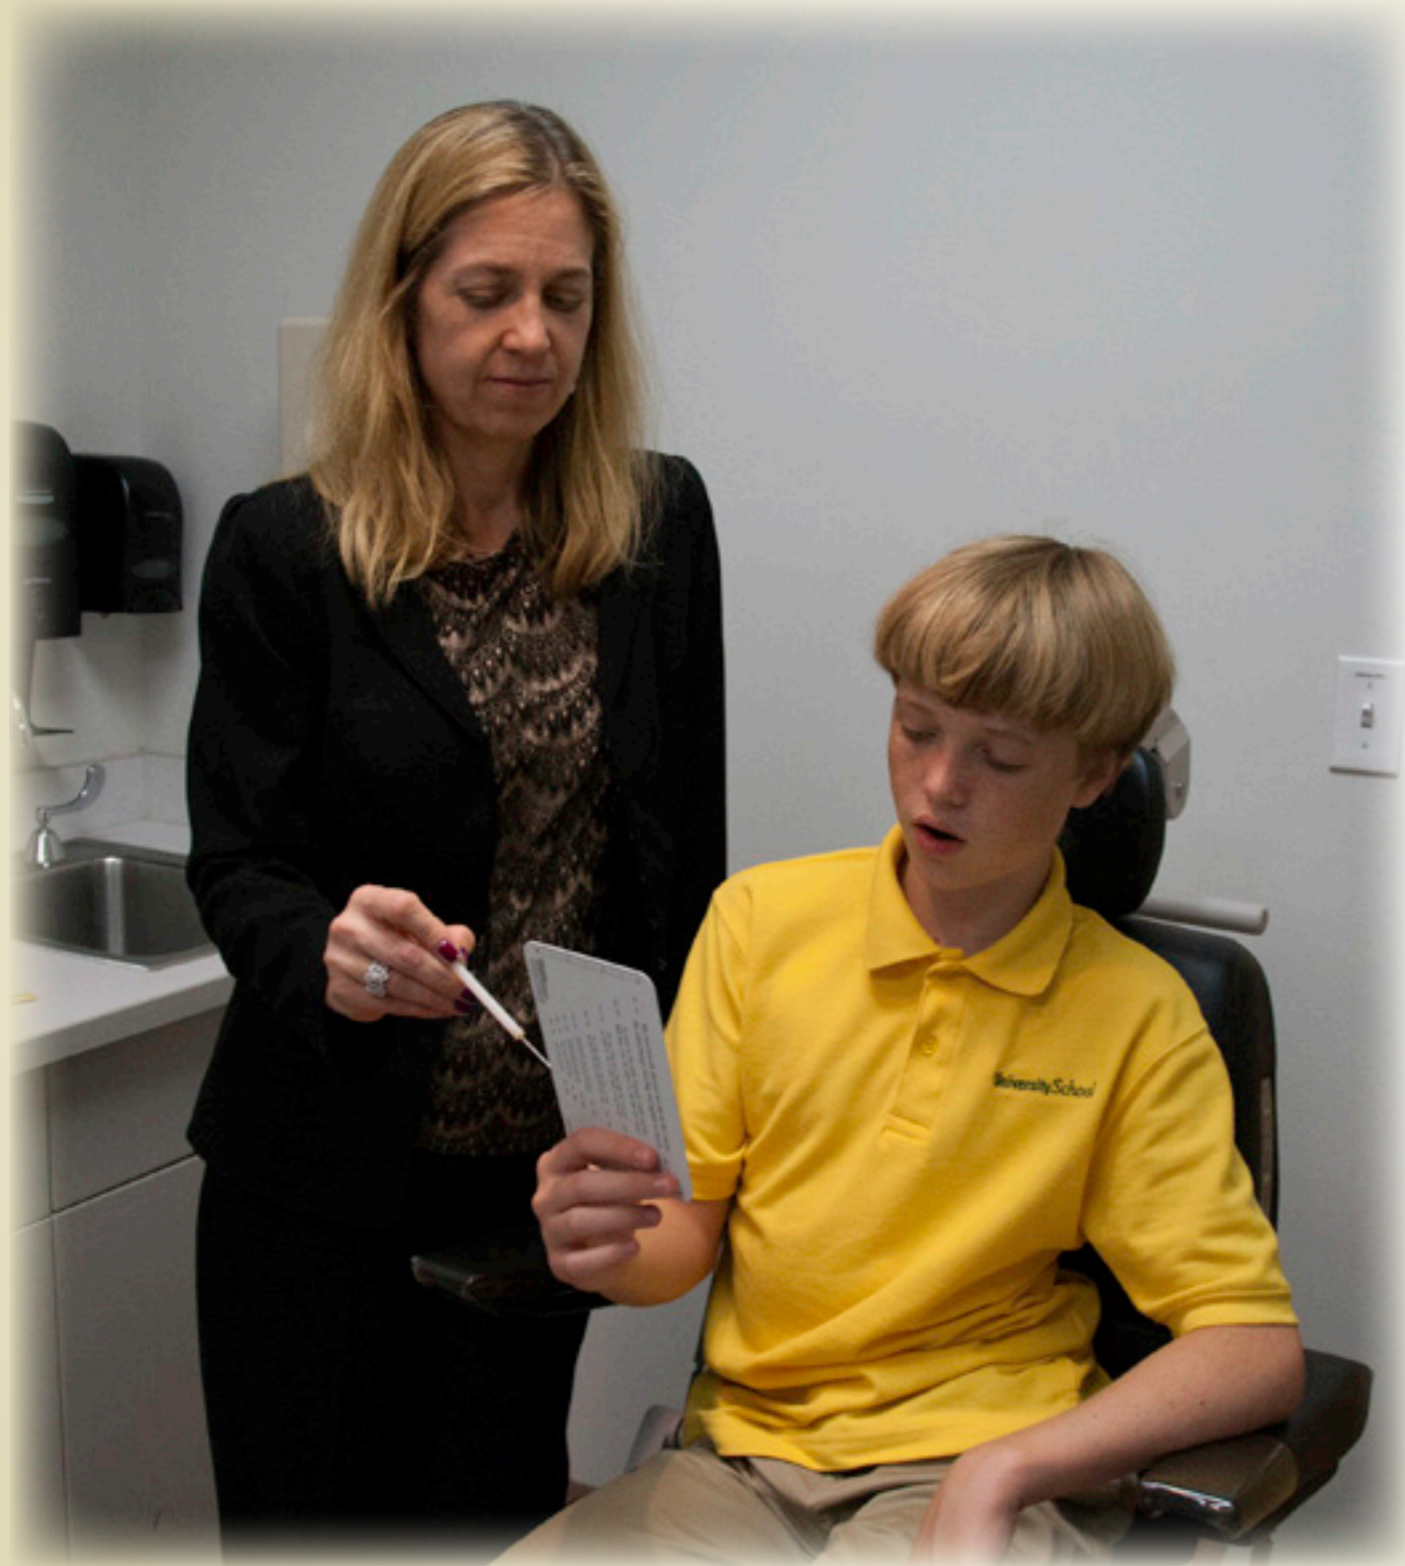

**Then the doctor showed a paper with lots of letters on it. I read all of the letters I could.**

**Then the doctor  
said that she  
wanted to look  
at my eyes with a  
microscope.**

**She showed me  
a big machine  
that was the  
microscope.**

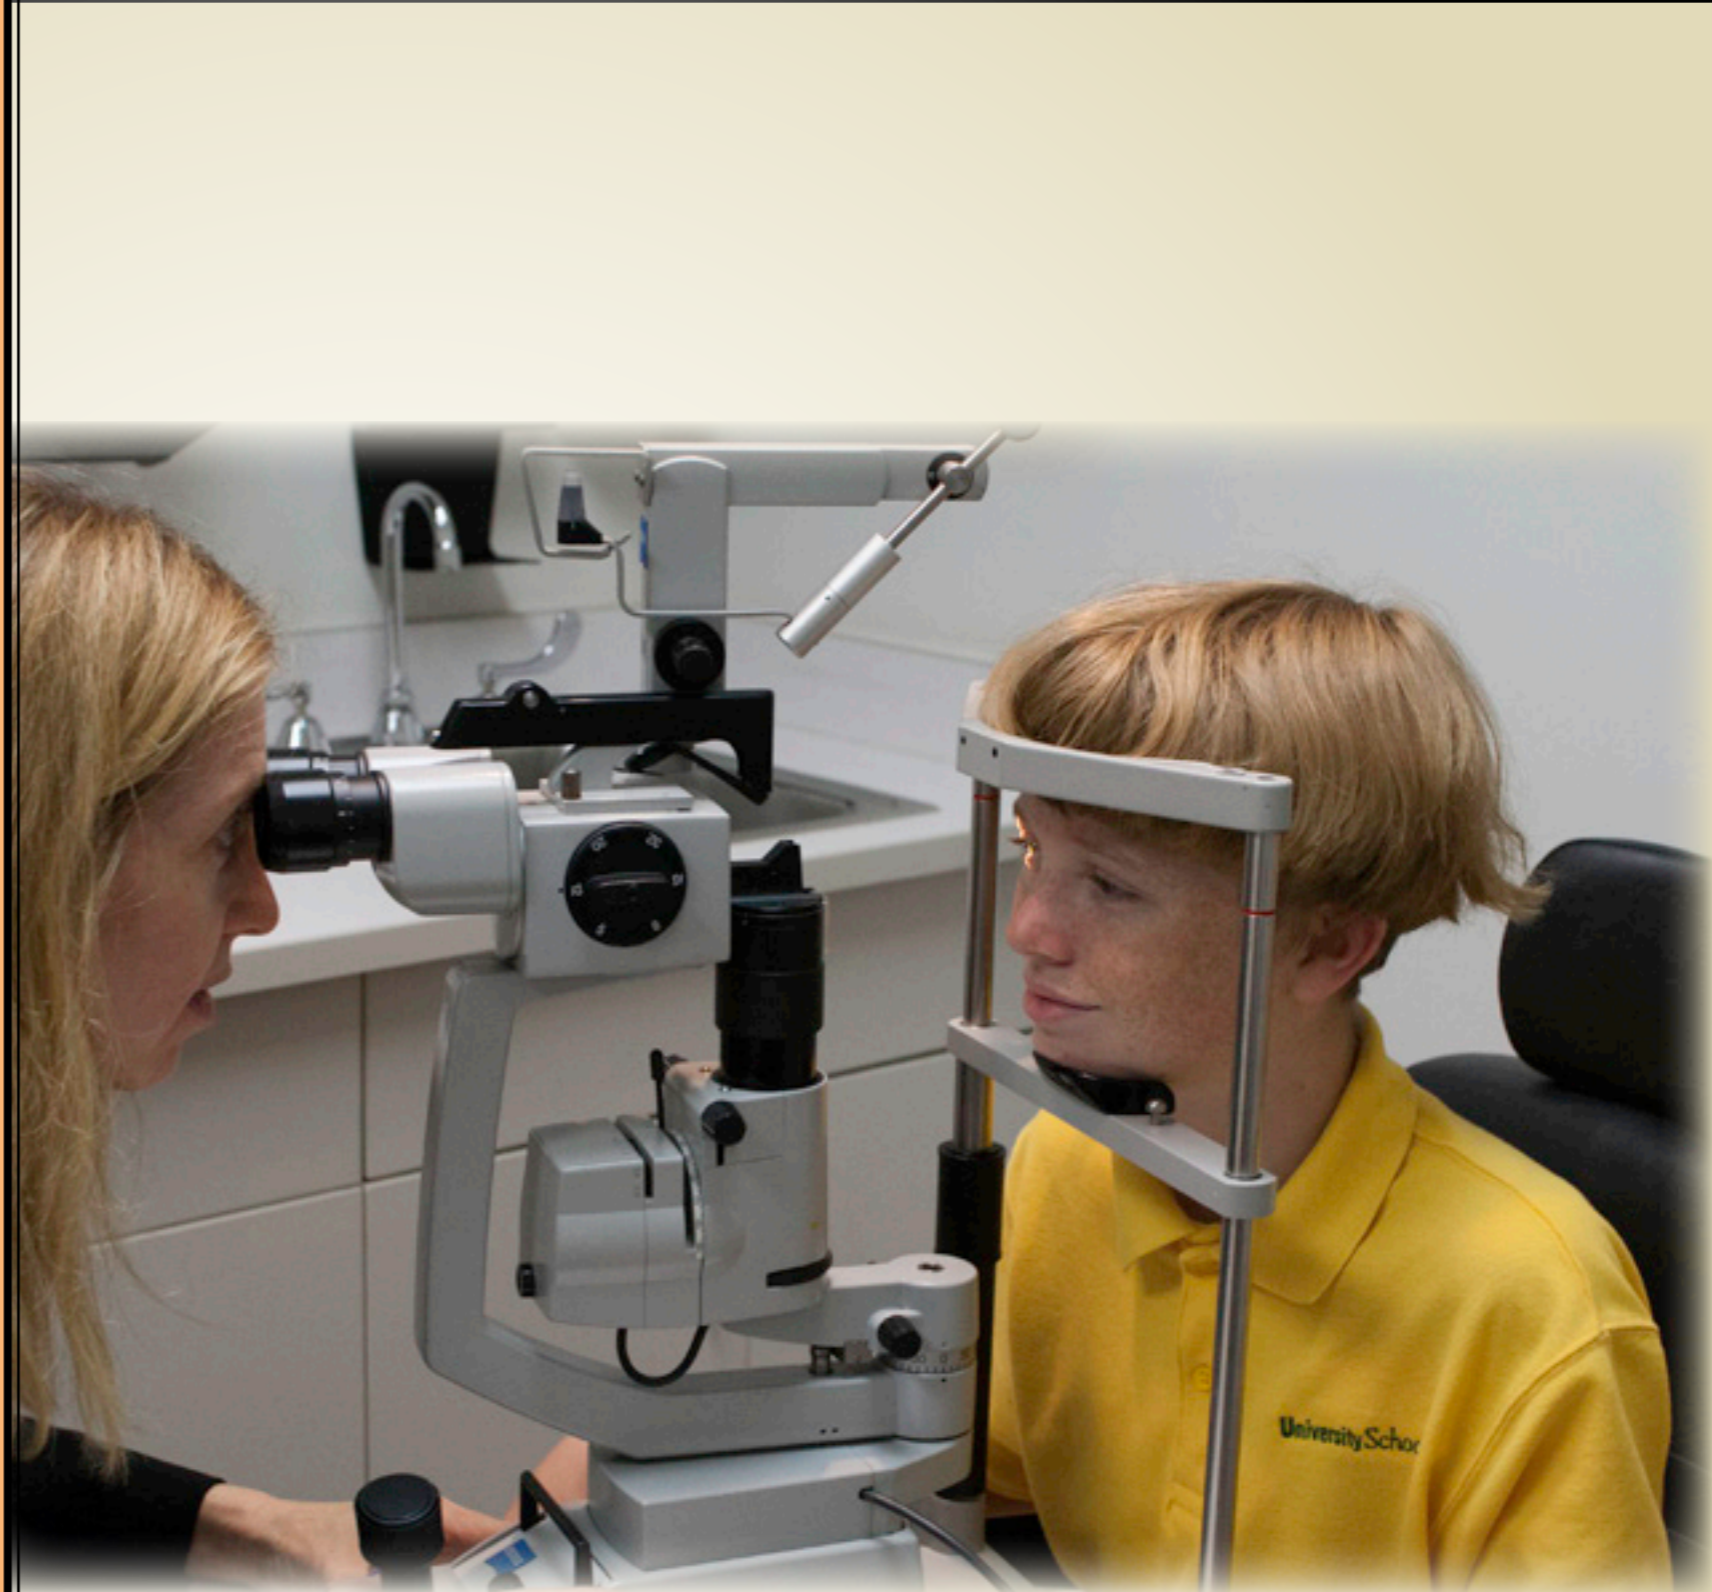

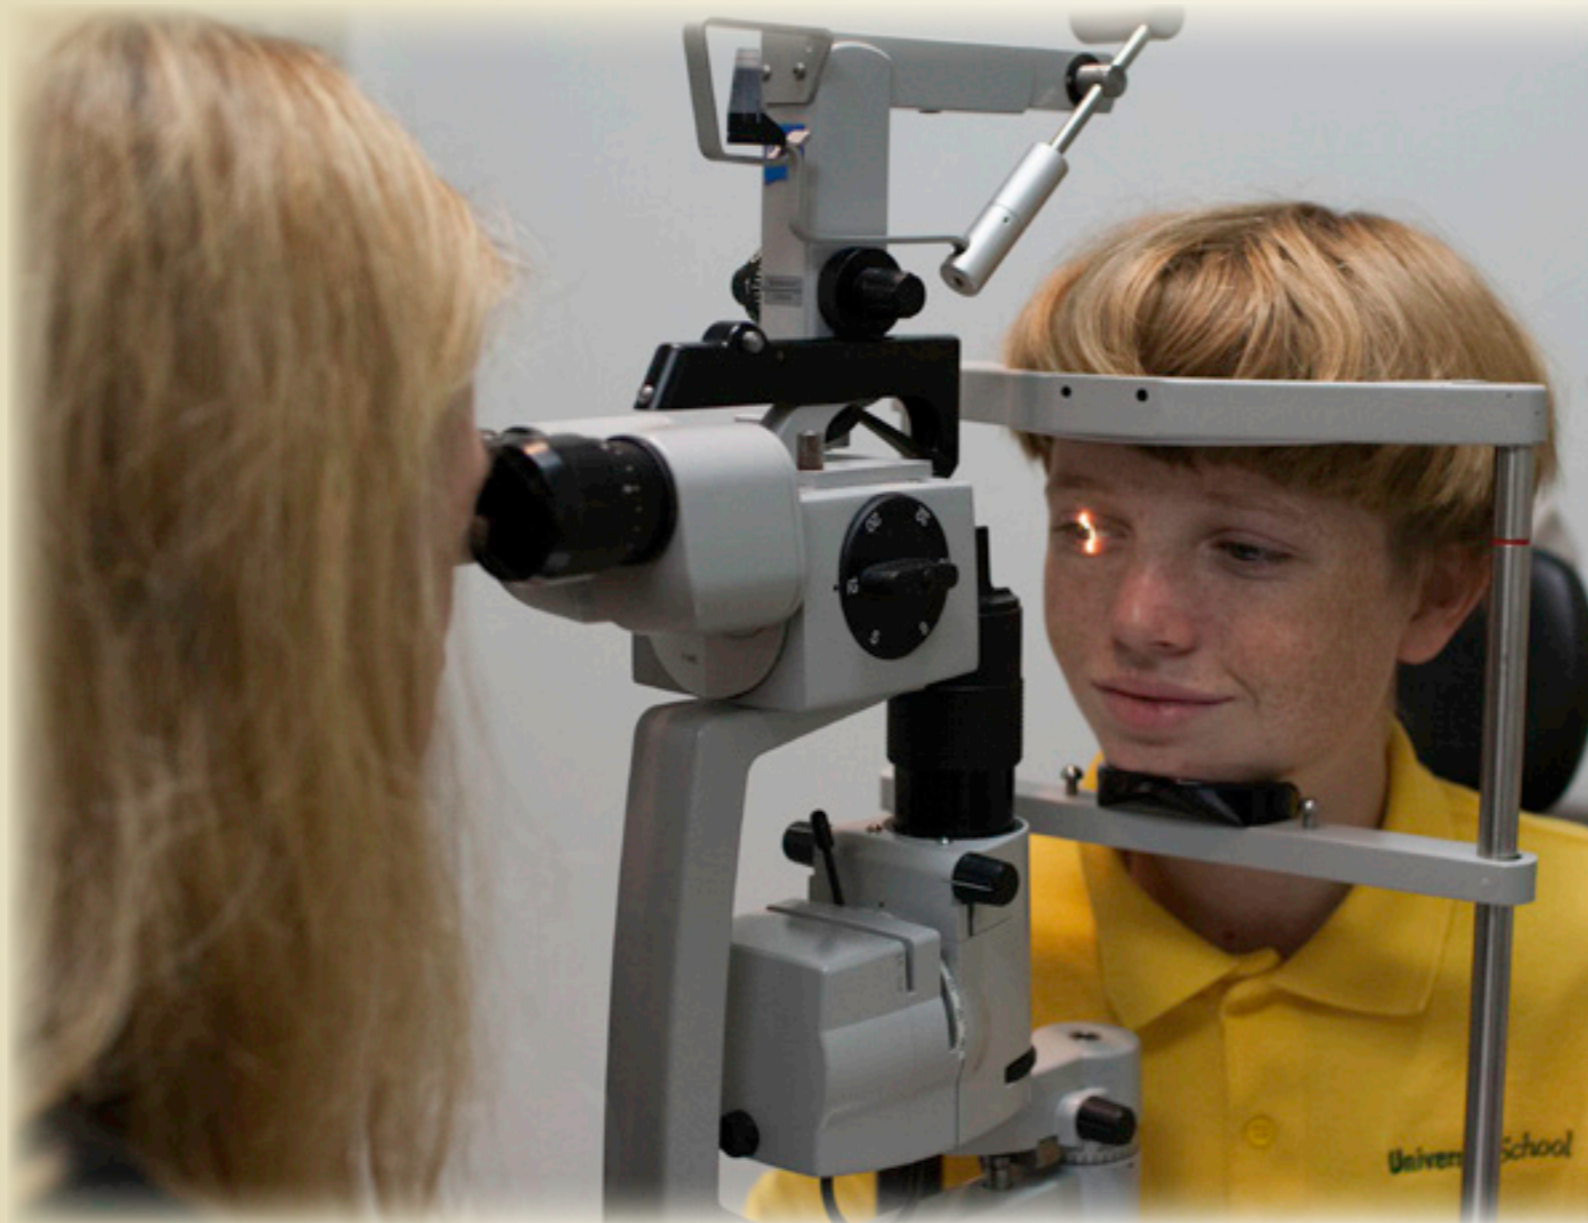

**The doctor turned on a light to see my eyes better.**

**She looked very closely at my eyes.**

**The doctor showed me a tool that she held in her hand.**

**Then I watched a video.**

**The doctor held the instrument close to my eye.**

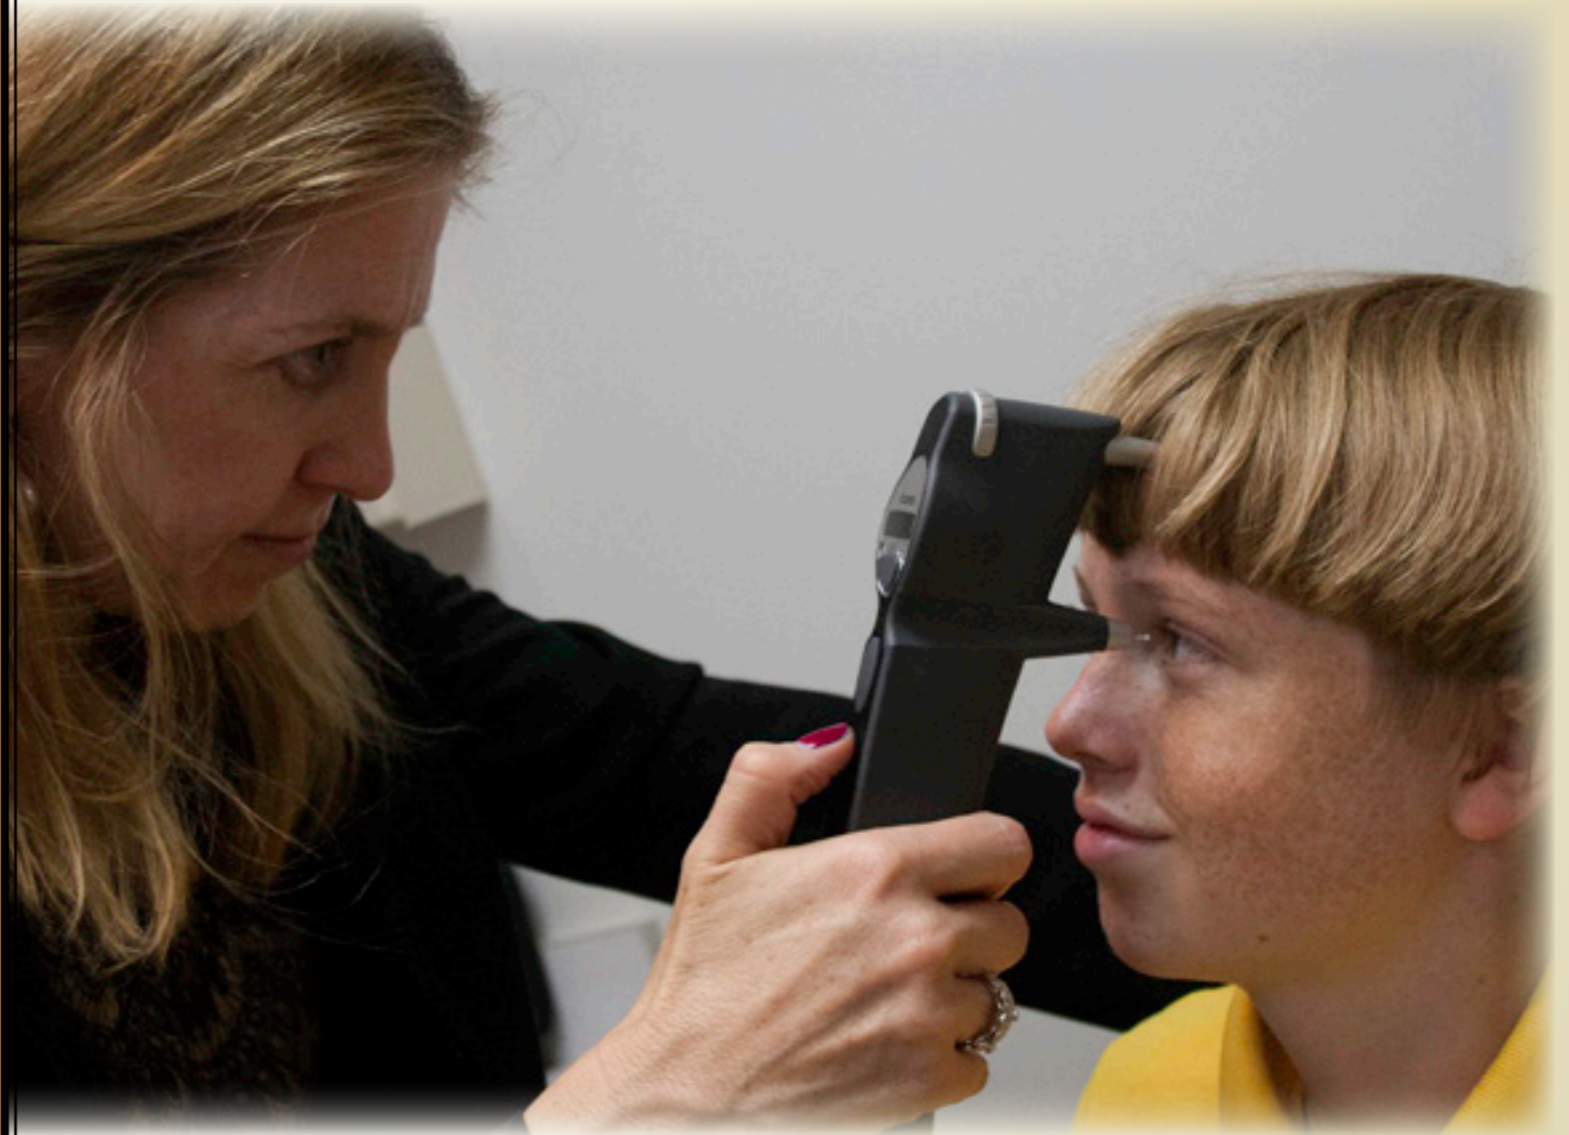

The doctor let me pick out a toy.  
I picked a orange squeezezy ball.

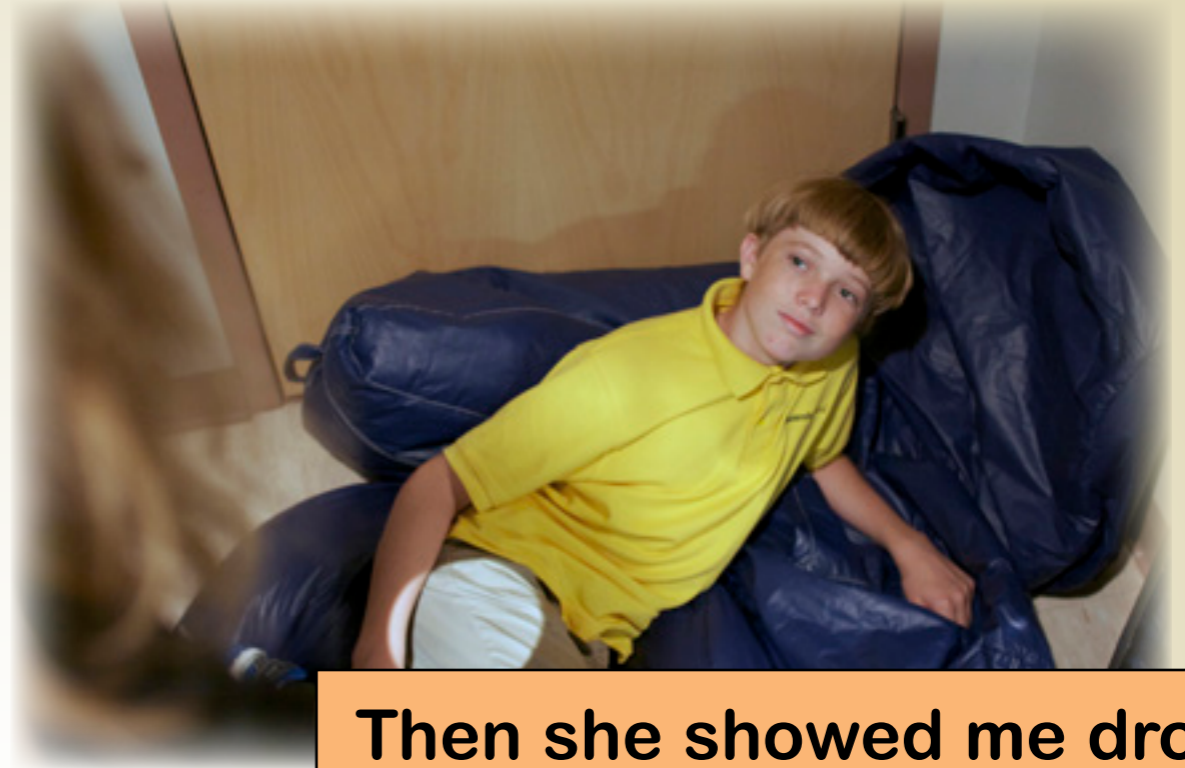

Then she showed me drops  
that were in a white bottle.

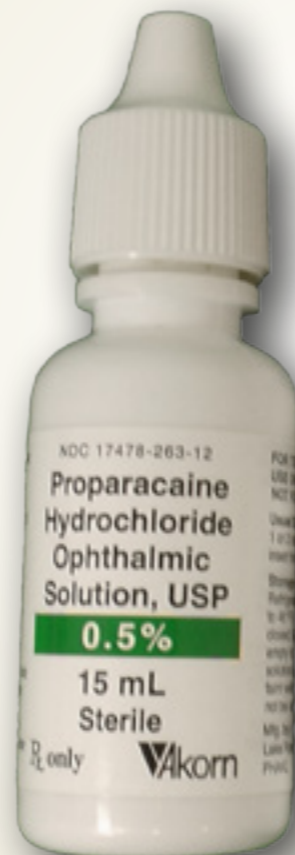

The doctor put drops on my hand. The drops did  
not hurt.

**Then the doctor  
put the drops in my  
eyes.**

**The doctor said that  
the drops would  
sting a little, but  
that the stinging  
would not last.**

**I squeezed the ball  
and counted to ten.  
The stinging was  
gone.**

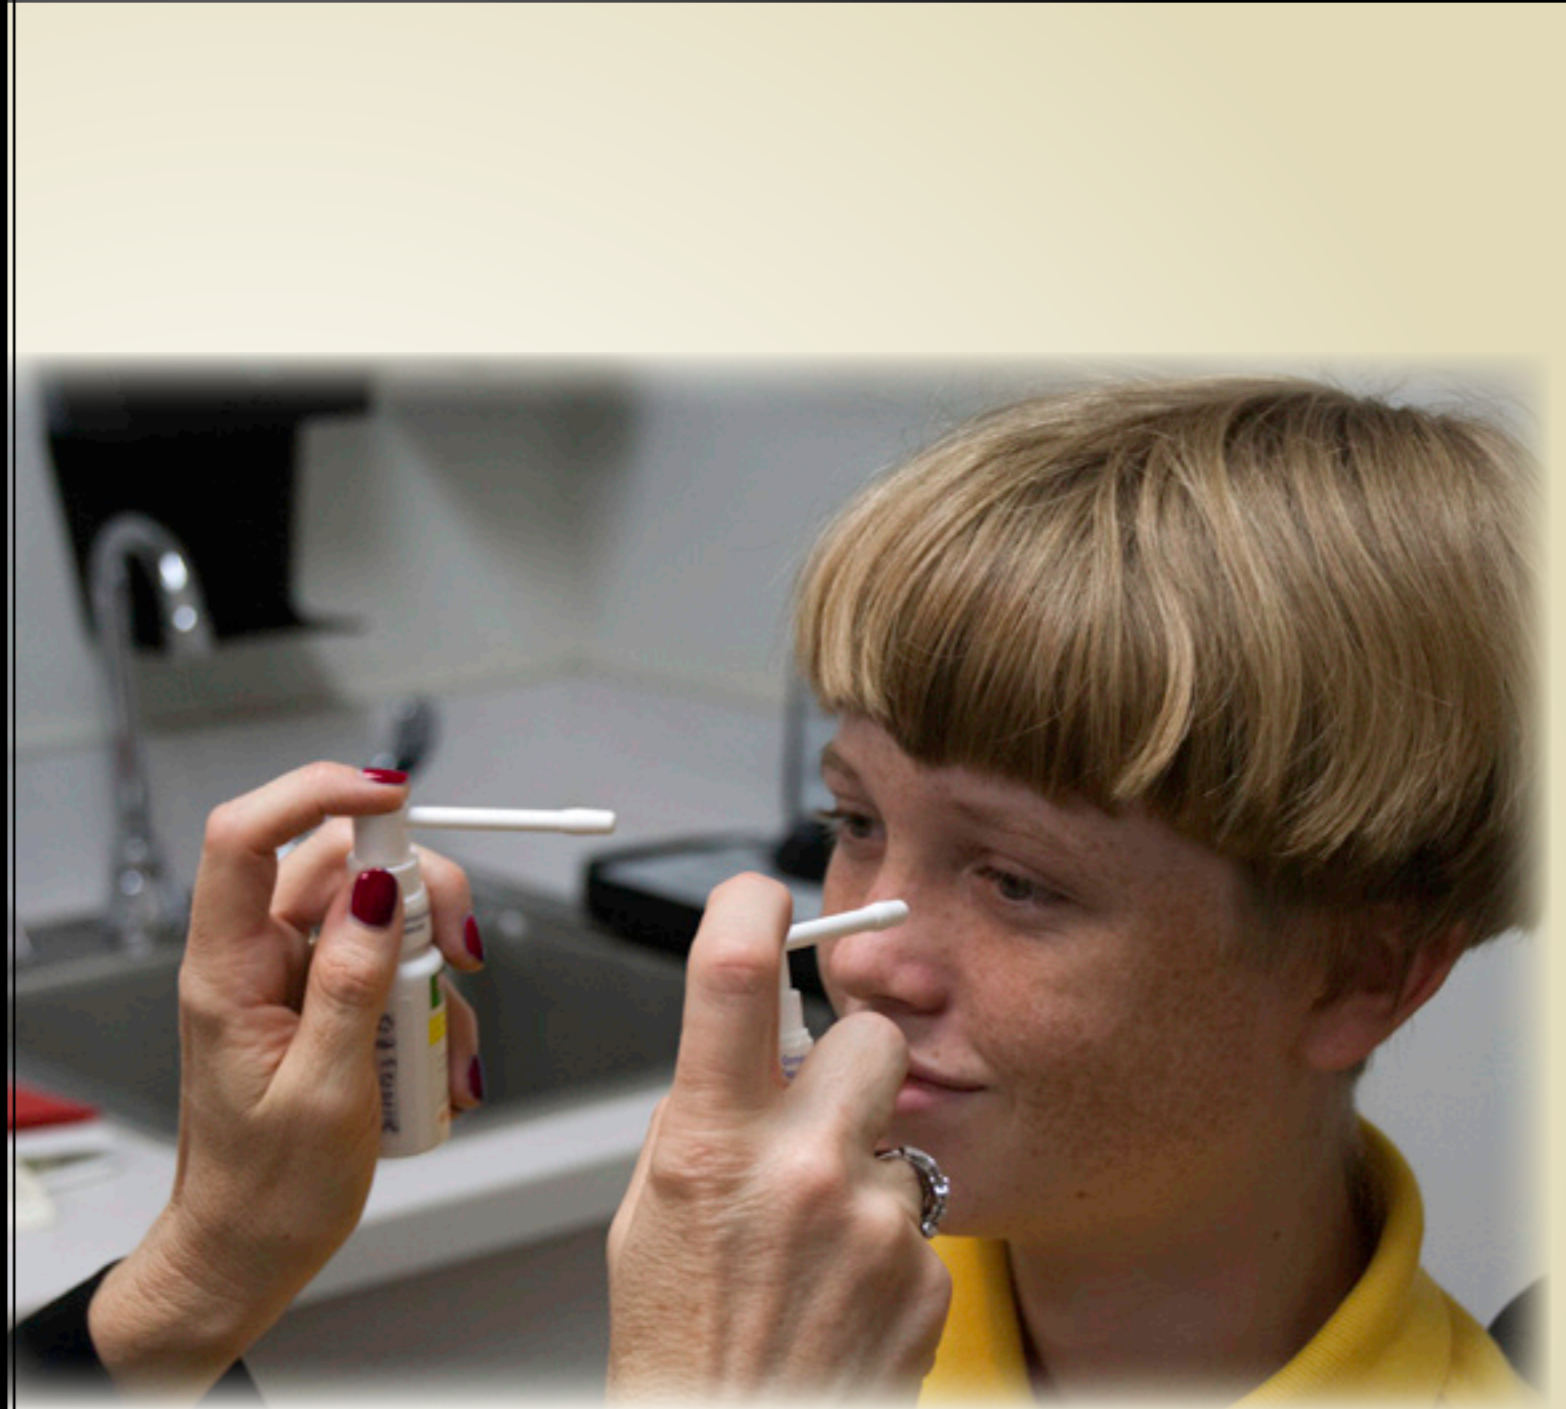

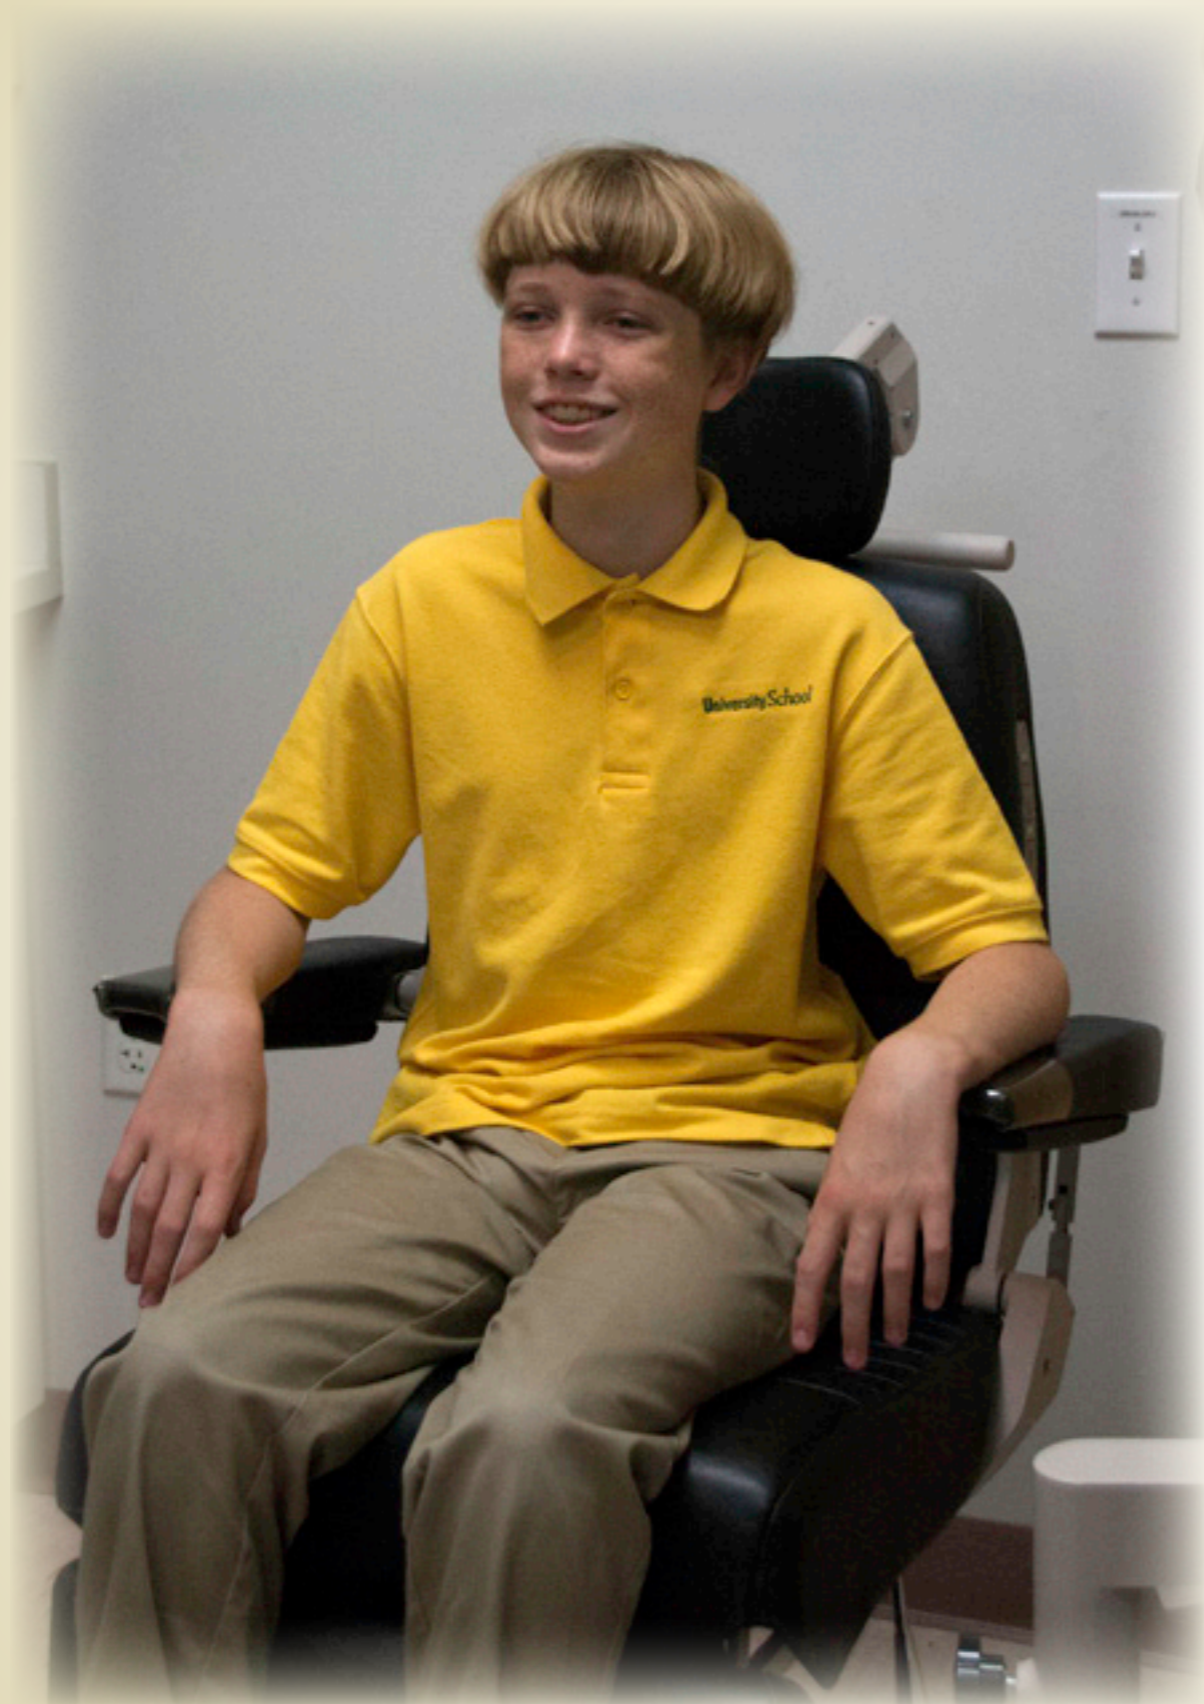

**The doctor said  
that I could take a  
break.**

**I played with the  
squeezy ball and  
watched a video.**

**Then, I couldn't  
see the video.  
That was O.K.**

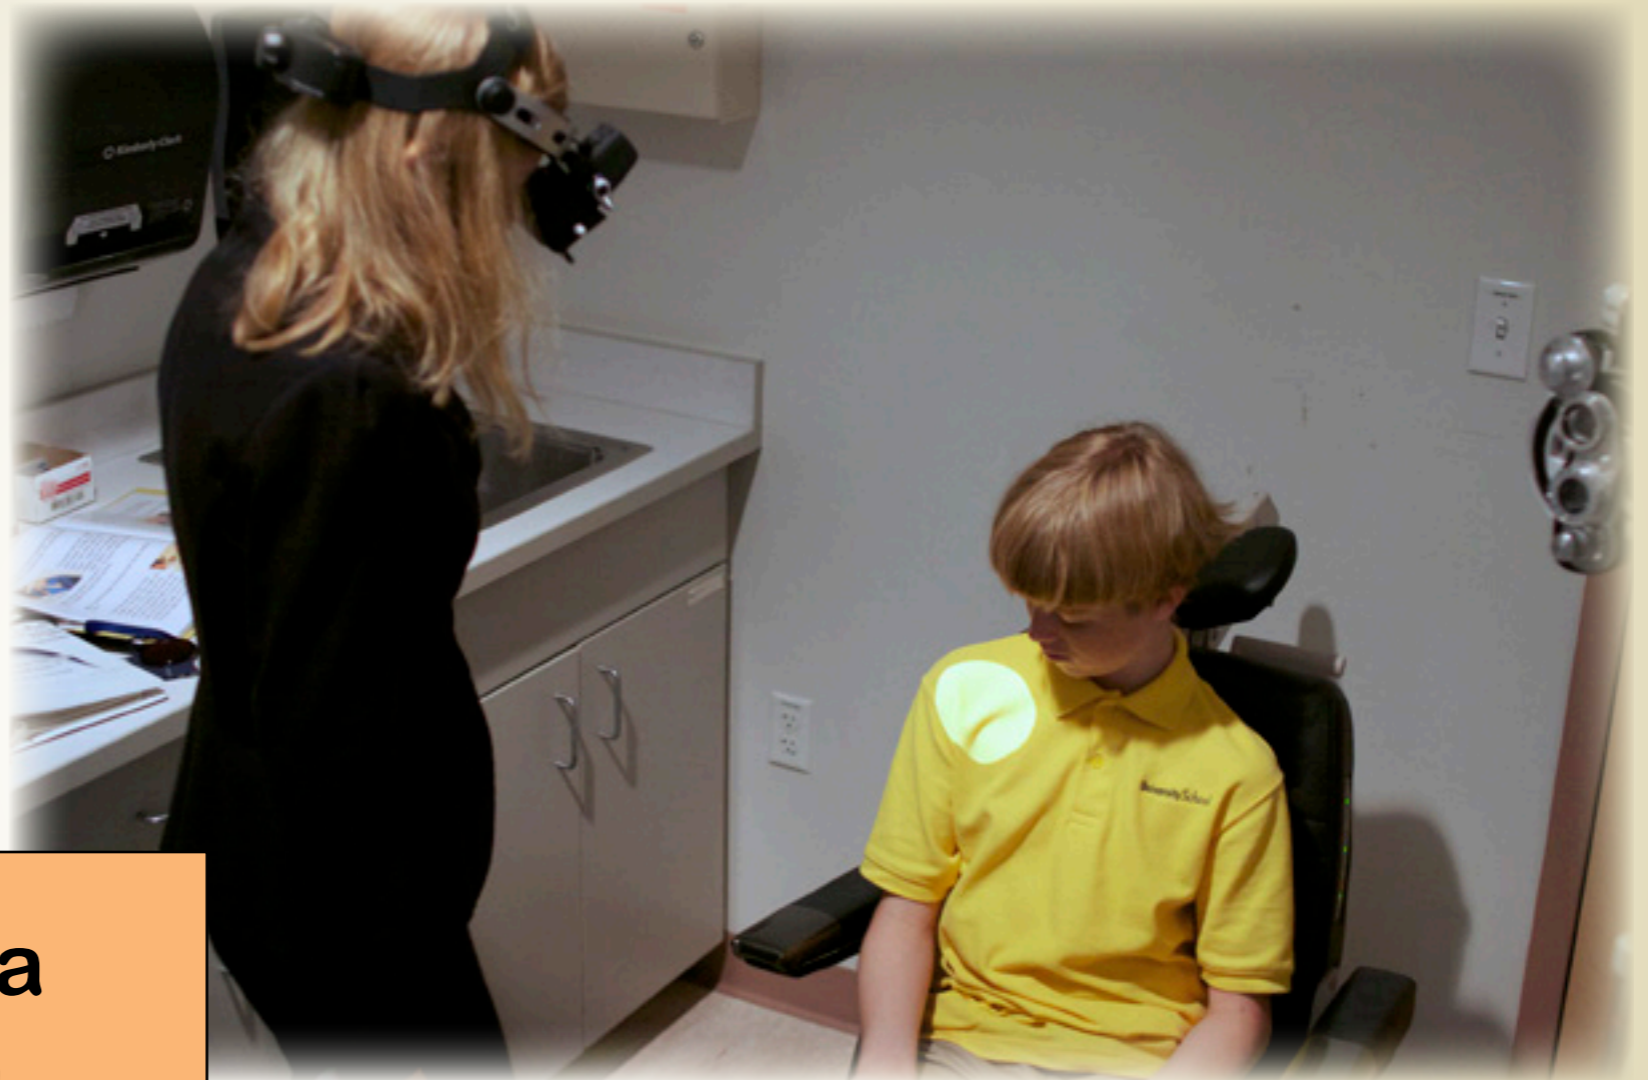

**The doctor put a big mask with a light on her face.**



**The doctor shined the light on my leg, it did not hurt.**

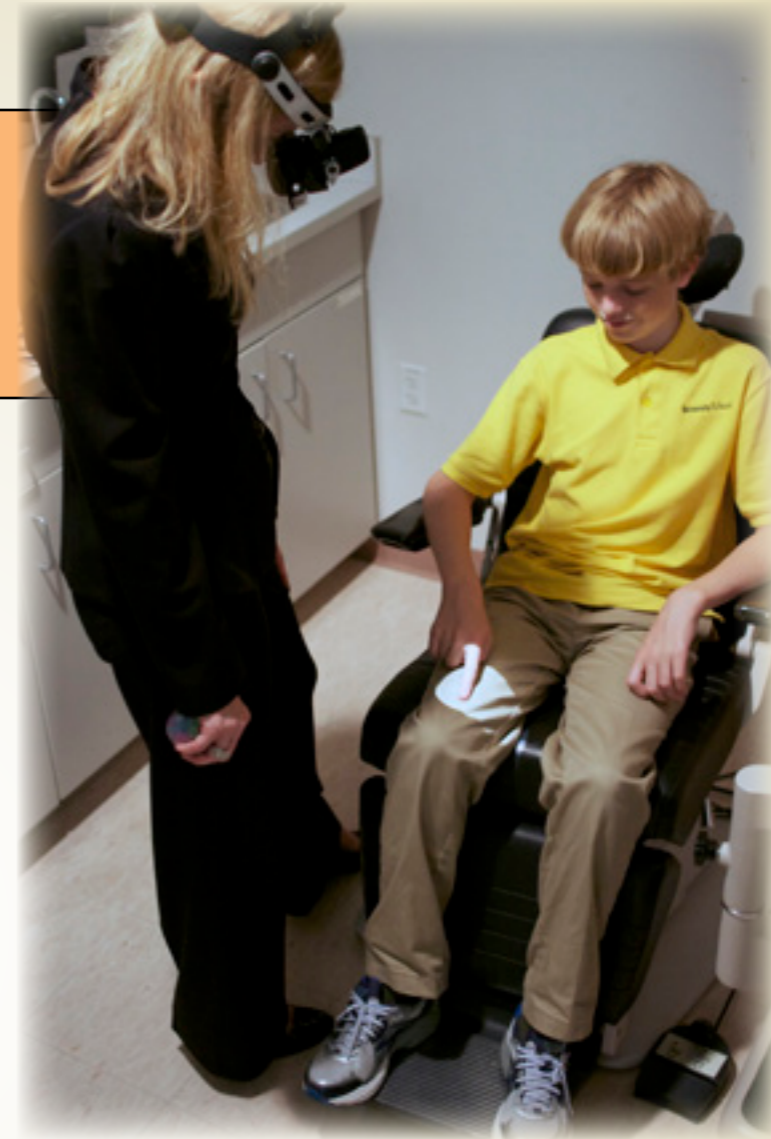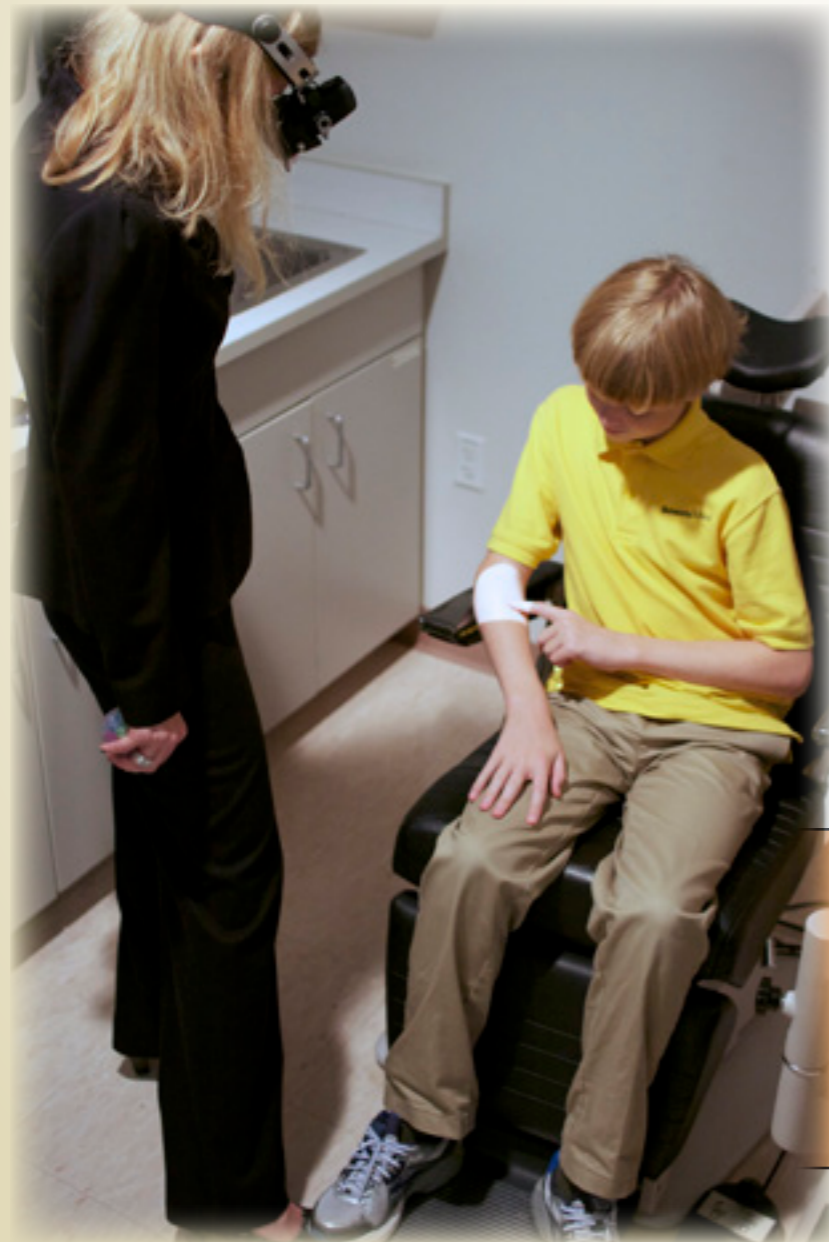

**The doctor put the light on my arm, it did not hurt.**

**Then the doctor put the light in my eyes.  
The light was very bright, but the light did not hurt.  
The doctor asked me to keep my eyes open.**

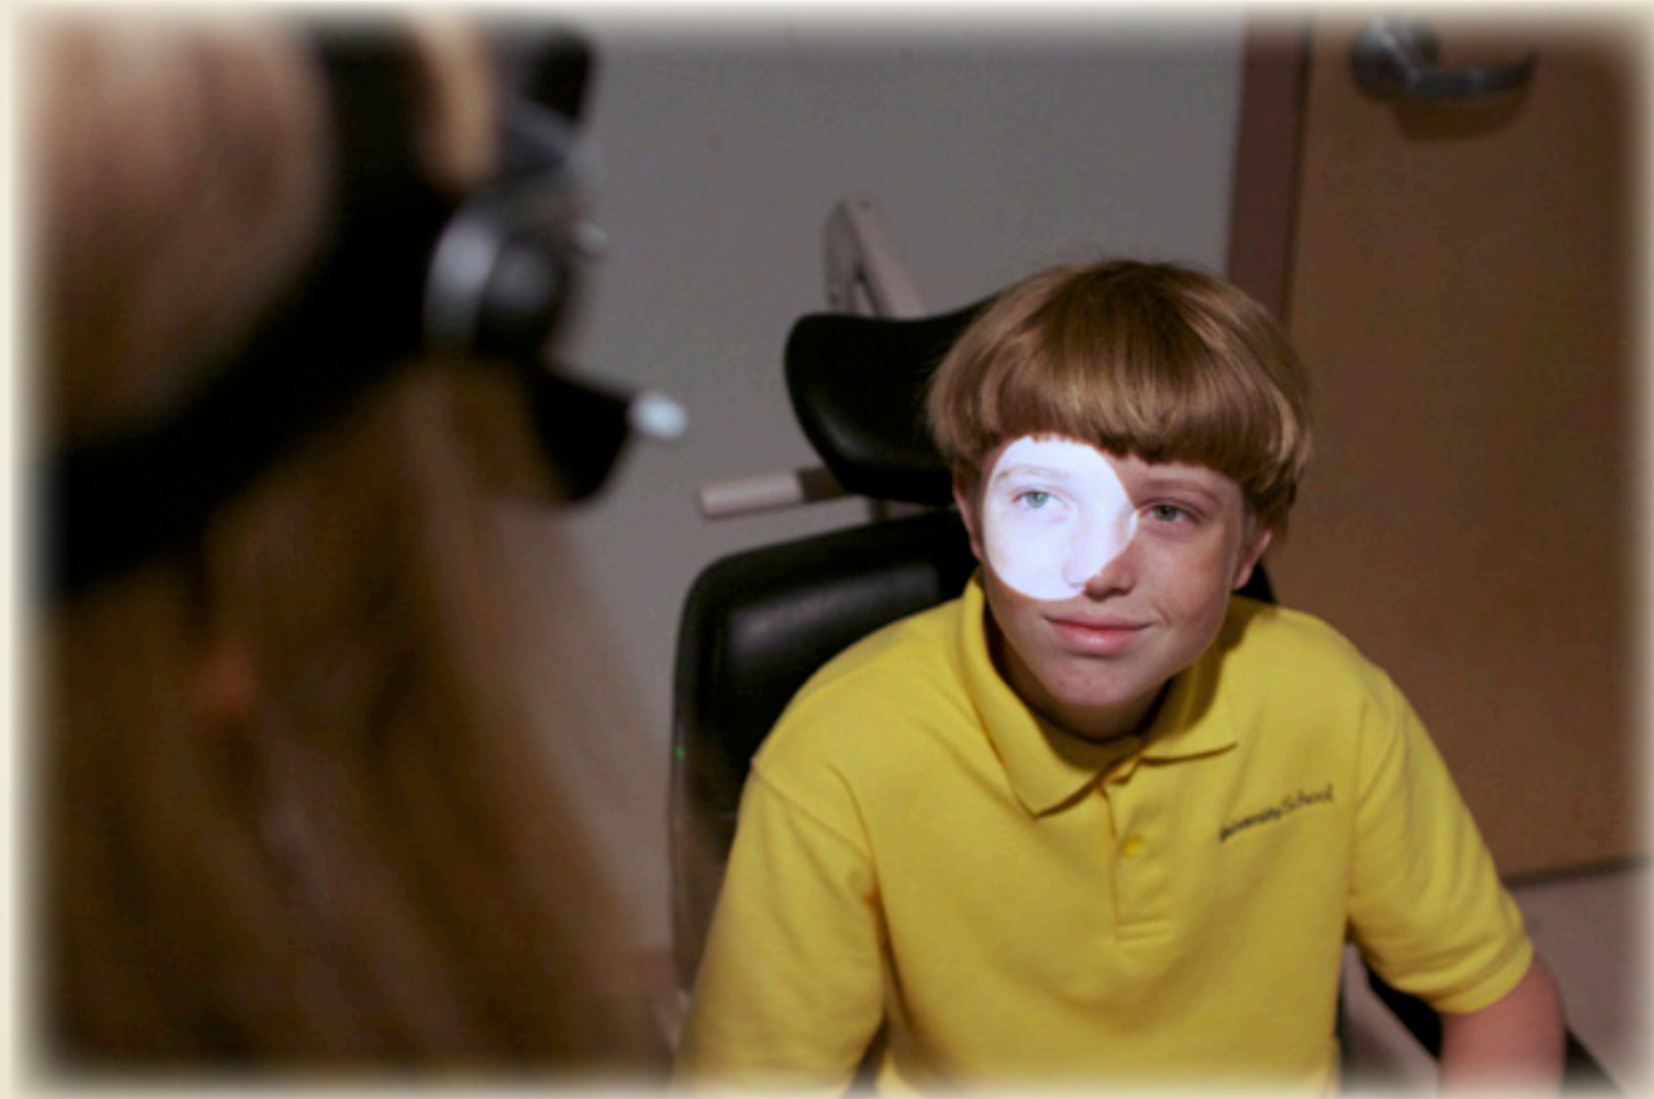

**The End**
