# Supplementary material
Source: PubMed Central journal article supplement (PMC4274340)
Supplement: opx-92-31-s002.pdf [file opx-92-31-s002.pdf]

# Visual Schedule for Examination

1

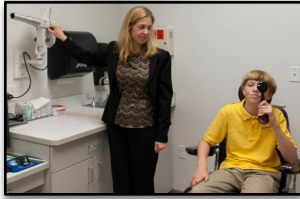

Binocular & Monocular Distance Visual Acuity

2

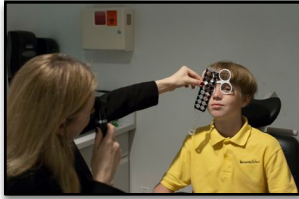

Retinoscopy

3

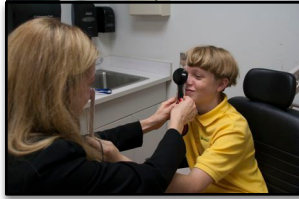

Cover/Uncover Test & Alternate Cover Test with Prism Neutralization at Distance and Near

4

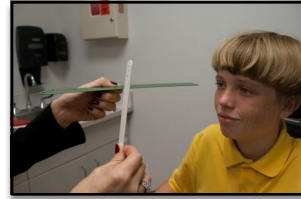

Near Point of Convergence

5

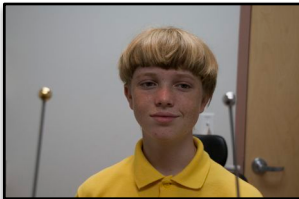

Ocular Motility Testing

6

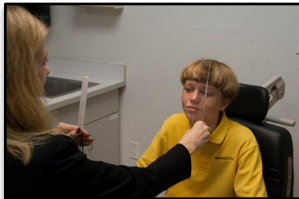

Near Fusional Vergence (Break & Recovery)

7

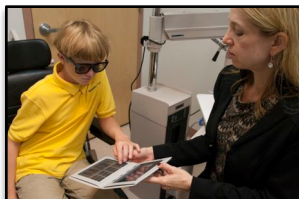

Stereoacuity

8

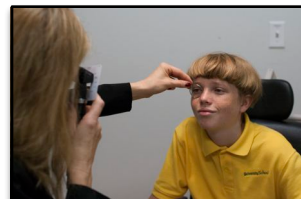

Monocular Estimation Method

9

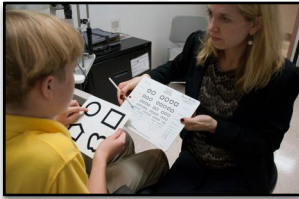

Binocular & Monocular Near Visual Acuity

10

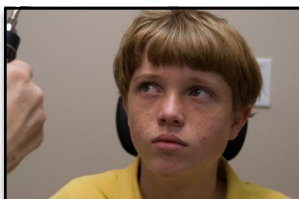

EOMs

11

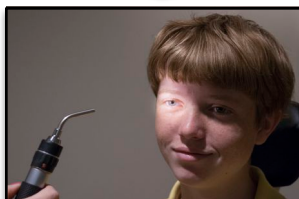

Pupil Testing

12

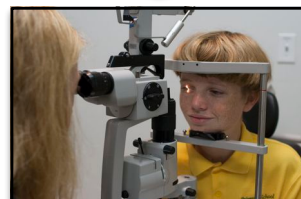

Anterior Segment Evaluation

13

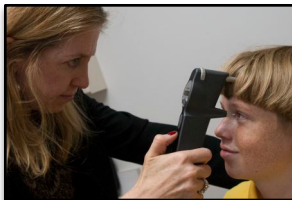

Icare Tonometry

14

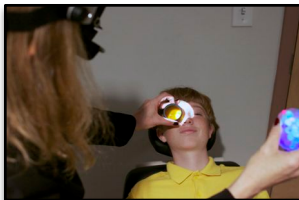

Dilated Posterior Segment Evaluation & Cycloplegic Retinoscopy
